1 **Smart Film Impacts Stomatal Sensitivity of Greenhouse Capsicum Through Altered**  
2 **Light**

3

4 **Running title:** Stomatal sensitivity of Smart Glass-grown Capsicum

5

6 Chenchen Zhao<sup>1,4,5</sup>, Sachin Chavan<sup>1,2</sup>, Xin He<sup>1,2</sup>, Meixue Zhou<sup>5</sup>, Christopher I. Cazzonelli<sup>1,2</sup>,  
7 Zhong-Hua Chen<sup>1,2,4</sup>, David T. Tissue<sup>1,2</sup>, Oula Ghannoum<sup>1,2,3\*</sup>

8

9 <sup>1</sup>Hawkesbury Institute for the Environment, Western Sydney University, Penrith, NSW 2751,  
10 Australia

11 <sup>2</sup>National Vegetable Protected Cropping Centre, Western Sydney University, Hawkesbury  
12 Campus, Richmond, NSW 2753, Australia

13 <sup>3</sup>ARC Centre of Excellence for Translational Photosynthesis, Australia

14 <sup>4</sup>School of Science, Western Sydney University, Penrith, NSW 2753, Australia

15 <sup>5</sup>Tasmanian Institute of Agriculture, University of Tasmania, Prospect, TAS, 7250, Australia

16

17 \*Author for Correspondence

18 Oula Ghannoum ([O.Ghannoum@westernsydney.edu.au](mailto:O.Ghannoum@westernsydney.edu.au))

19

20 Total words count (excluding Abstract and References): 6299

21

## 22 Abstract

23 Optical films that alter light transmittance may reduce energy consumption in high-tech  
24 greenhouses, but their impact on crop physiology remains unclear. We compared the stomatal  
25 responses of capsicum plants grown hydroponically under control glass (70% diffuse light) or  
26 smart glass (SG) film ULR-80, which blocked >99% of ultraviolet light and 19% of  
27 photosynthetically active radiation (PAR). SG had no significant effects on steady-state ( $g_s$ )  
28 or maximal ( $g_{max}$ ) stomatal conductance. In contrast, SG reduced stomatal pore size and  
29 sensitivity to exogenous ABA thereby increasing rates of leaf water loss, guard cell  $K^+$  and  
30  $Cl^-$  efflux, and  $Ca^{2+}$  influx. The transition between low ( $100 \mu\text{mol m}^{-2} \text{s}^{-1}$ ) and high ( $1500$   
31  $\mu\text{mol m}^{-2} \text{s}^{-1}$ ) PAR induced faster stomatal closing and opening rates in SG relative to control  
32 plants. The fraction of blue light (0% or 10%) did not affect  $g_s$ , but induced stomatal  
33 oscillations in SG plants. Increased expression of stomatal closure and photoreceptor genes in  
34 epidermal peels of SG plants is consistent with fast stomatal responses to light changes. In  
35 conclusion, light intensity was more critical than spectral quality for optimal stomatal  
36 responses of capsicum under SG, and re-engineering of the SG should maximize PAR  
37 transmission to maintain a better stomatal development.

38

39 **Keywords:** abscisic acid, greenhouse horticulture, light spectrum, smart glass, stomatal  
40 conductance, *Capsicum annuum*

41

## 42 Highlights

- 43 • Capsicum plants grown under SG film exhibit decreased stomatal pore area, higher  
44 water loss and reduced ABA-sensitivity.
- 45 • SG-grown plants have faster rates of stomatal closing and opening in response to light  
46 intensity changes.
- 47 • SG increases efflux of  $K^+$  and  $Cl^-$  and influx of  $Ca^{2+}$  of guard cells.
- 48 • SG upregulated the expression of key genes involved in stomatal regulation and light  
49 sensing.

## 50 **Introduction**

51 Efficient climatic control in protected cropping can be achieved by alterations in  
52 greenhouse structures. These include the even-span greenhouse designed for crop  
53 cultivation at high latitude (Sethi, 2009), optimal orientation allowing plants to receive  
54 more radiation (Xu *et al.*, 2015), different greenhouse shapes to improve the  
55 ventilation (Katsoulas *et al.*, 2006), and building materials utilising a special plastic  
56 film to block UV radiation and enhance light diffusion (Hemming *et al.*, 2004). Other  
57 techniques such as vent, fog, fan cooling systems, dehumidification, and regeneration  
58 process of liquid desiccant also improve glasshouse climatic control (Lefers *et al.*,  
59 2016; Rabbi *et al.*, 2019; Samaranayake *et al.*, 2020; White, 2014). However, the high  
60 cost of these solutions indicates that an innovative alternative technique of using low  
61 emissivity ‘smart glass’ film, should significantly reduce the costs while maintaining  
62 adequate climate control in glasshouses (Lin *et al.*, 2020).

63

64 The special glass film materials are optically engineered in a nanometre-scale, adjusting light  
65 transmittance to allow for high potential of reducing energy cost in high technology  
66 greenhouses (Lin *et al.*, 2020). The “smart glass” (SG) film ULR-80 blocks the majority of  
67 UV light and a proportion of far-red and red light, which can reduce energy load required for  
68 heating and cooling in a protected cropping situation (Chavan *et al.*, 2020). However,  
69 reducing the photosynthetically active radiation (PAR) potentially decreases the growth and  
70 productivity of horticultural crops. In a recent study using eggplant grown in a high-tech  
71 glasshouse, the application of the SG film led to a net reduction in heat load, water and  
72 nutrient consumption and therefore improved energy and resource use efficiency. However,  
73 the 19% decrease in PAR reduced fruit yield of eggplants under SG glass by 25% compared  
74 to normal control glass (Chavan *et al.*, 2020). Whilst SG consistently reduced photosynthetic  
75 rates, the response of stomatal conductance was less consistent, decreasing in one season and  
76 remaining unaffected in another season (Chavan *et al.*, 2020). Optimal stomatal function is  
77 crucial for plant photosynthesis (Farquhar and Sharkey, 1982) and water use efficiency  
78 (Lawson and Vialet-Chabrand, 2019), but can be compromised under adverse light  
79 conditions (O’Carrigan *et al.*, 2014). To what extent the effects of altered light conditions  
80 generated by a SG film have on stomatal morphology and physiology remains unclear.

81

82 PAR, including wavelengths between 400 to 700 nm, supplies the essential photons utilised  
83 by plants during photosynthesis, which is highly dependent on its intensity (McCree, 1981).  
84 Light directly and indirectly (via photosynthesis) regulates stomatal function (Assmann and  
85 Jegla, 2016). Plants have developed sensing mechanisms for both light quantity and quality  
86 (Aasamaa and Söber, 2011; Ballard *et al.*, 2019; Düring and Harst, 2015), to adjust stomatal  
87 aperture, allowing CO<sub>2</sub> absorption for carbon fixation. Light also plays important roles in  
88 stomatal formation, as well as closing and opening of the guard cells (Roelfsema and  
89 Hedrich, 2005). As highly specialized cells, guard cells that form the stomatal pore mediate  
90 physiological trade-offs to minimize water loss while maximizing carbon gain in the light. An  
91 important limitation in this process is the rate at which stomata open in the light or close in  
92 darkness, referred to as stomatal conductance (Drake *et al.*, 2013). Rapid stomatal responses  
93 to light help to optimise plant photosynthesis (Lawson and Vialet-Chabrand, 2019).  
94 Photosynthetic capacity is well linked with the theoretically maximum stomatal conductance  
95 ( $g_{max}$ ) and operational stomatal conductance ( $g_{op}$ ) calculated from stomatal morphological  
96 parameters, such as stomatal sizes and stomatal density (McElwain *et al.*, 2016).

97

98 Long-term effects of light quantity and quality on stomatal density and conductance have  
99 been well studied (Savvides *et al.*, 2012). Stomatal density increases under high light (Gay  
100 and Hurd, 1975), leading to increased stomatal conductance and CO<sub>2</sub> assimilation (Baroli *et al.*,  
101 2008). High light stimulate a rapid stomatal closure along with a rapid production of  
102 reactive oxygen species (ROS) (Devireddy *et al.*, 2018). ROS accumulation in guard cells  
103 activates key ion channels such as slow anion channel (SLAC1) and outward rectifying K<sup>+</sup>  
104 channel (GORK) for stomatal closure (Brandt *et al.*, 2012; Deger *et al.*, 2015; Lind *et al.*,  
105 2015; Zhao *et al.*, 2018). Moreover, photoreceptors are key players in the response of plant  
106 growth and yield to changes of light environment (Babla *et al.*, 2019; Casal, 2013). Blue  
107 light-induced stomatal opening is mediated by the light receptor phototropins (PHOT1 and  
108 PHOT2) and cryptochromes (CRY1 and CRY2) (Wang *et al.*, 2010), while red light induced  
109 stomatal opening is mediated by phytochromes (PHYs) (Wang *et al.*, 2010). Other light-  
110 related genes such as *UV-B Photoreceptor 8 (UVR8)*, *Light-Harvesting Component B*  
111 *(LHCB)*, and *Ribulose Bisphosphate Carboxylase Small Chain 1 (RBCS1)* can regulate plant  
112 photosynthetic rates (Baroli *et al.*, 2008; Borkowska, 2005; Davey *et al.*, 2012; Tossi *et al.*,

113 2014; Wang *et al.*, 2010; Xu *et al.*, 2012). Their responses to SG may elucidate the potential  
114 mechanisms that control the stomatal regulation in capsicum.

115

116 Our overarching hypothesis was that altered light conditions under SG reduce stomatal  
117 density and aperture and affect stomatal sensitivity and guard cell ion fluxes due to regulation  
118 of ABA and photoreceptors signalling networks. To address this hypothesis, we used  
119 *Capsicum annuum* L., for studying stomatal morphology and physiology. Capsicum, also  
120 known as sweet pepper, is the second most cultivated crop after tomatoes in protected  
121 cropping in many countries including Australia. Studies on capsicum have mainly focussed  
122 on developmental responses to temperature, humidity, and water stress (Bakker, 1989a, b;  
123 Hawa, 2003). In this study, we cultivated capsicum plants for 8 months with and without SG  
124 film and measured stomatal density, size, guard cell ion fluxes, rate of stomatal response to  
125 exogenously applied ABA, and the expression of genes involved in ABA and light signalling  
126 networks. We next tested whether signalling pathways triggered by light transitions were  
127 altered in a manner that would affect stomatal regulation. We demonstrate that the SG-  
128 induced reduction in PAR altered stomatal morphology, behaviour and downstream  
129 signalling cascades.

130

131 **Material and Methods**

132 ***Plant growth and experimental design***

133 The experiment was conducted from April (Autumn in Australia) to Dec 2019 (Summer in  
134 Australia) in the state-of-the-art glasshouse facility at Western Sydney University (33°S  
135 150°E, Hawkesbury Campus, Richmond, NSW, 2753 Australia). A detailed description of  
136 the facility, including software and climate control is presented by Chavan et al. (2020) and  
137 Samaranayake et al. (2020). We used four research bays (105m<sup>2</sup> each) with precise  
138 environmental control of atmospheric CO<sub>2</sub>, air temperature, RH, and hydroponic nutrient and  
139 water delivery. *Capsicum annuum* L. seeds (variety Ghia, Syngenta, Australia) were grown in  
140 a nursery centre (Withcott Seedlings, Withcott, QLD, 4352 Australia) for six weeks. The  
141 seedlings were transplanted in Rockwool slabs and transferred into two control hazed glass  
142 (Control) and two SG (Treatment) bays.

143 The control bays were fitted with HD1AR diffuse glass (70% haze) and the treatment bays  
144 had HD1AR diffuse glass, but were also coated with ULR-80 window film, known as “Smart  
145 Glass” (SG) (Solar Gard, Saint-Gobain Performance Plastics, Sydney, Australia). The SG  
146 film ULR-80 has a low thermal emissivity (0.87) which blocks the light that mainly  
147 contributes to heat, but transmits most of the wavelengths of light used by plants for growth  
148 in the PAR region. According to the manufacturer specifications, SG blocks around 88%  
149 light in the infrared (IR) and far-infrared (FIR) region between 780 nm - 2500 nm; and >99%  
150 light in the ultraviolet (UV) region between 300 and 400 nm. SG blocks 43% of total solar  
151 energy with 40% transmission, 54% absorption and 6% reflectance. The two control research  
152 bays consist of roof glass (70% diffuse light) and wall glass (5% diffuse light). Each bay had  
153 6 gutters with length at 10.8 m and width at 25 cm (AIS Greenworks, Castle Hill, NSW,  
154 Australia), which were fitted with 10 Rockwool slabs (90 × 15 × 10 cm, Grodan, The  
155 Netherlands) per gutter. Three plants per slab were planted in the four middle gutters, and  
156 two plants per slab were planted in the two side gutters which served as buffer plants. Plants  
157 were grown in natural light and photoperiod conditions, 25/20°C (day/night) air temperature,  
158 70/80% (day/night) relative humidity, and non-limiting nutrient and water (fertigation)  
159 supplied at industry standards. For sample collection and stomatal morphological  
160 measurement, unless clarified, top canopy leaves fully exposed to light from each two bays  
161 were investigated. Sample collections were completed during sunny conditions on the same  
162 day or continuous days to minimise weather effect.

### 163 ***Relative water loss measurement***

164 Top canopy capsicum leaves which were fully exposed to natural glasshouse light were  
165 investigated for relative water loss rate (RWL). RWL was measured using the following  
166 equation with modifications (Weatherley, 1950),  $RWL = (FM - FM_t)/FM \times 100\%$ . Fresh  
167 Mass (FM) was determined immediately after samples were collected, and the samples were  
168 weighed and recorded as  $FM_t$  on a scale every ten min for 90 mins. Overall, 10-time points  
169 (including 0 min as control) were recorded and the ratio was used to determine differences in  
170 the rate of water loss from plants in SG and Control. Five independent leaves from the top  
171 canopy of five independent capsicum plants from two bays were collected around 9:00 am on  
172 the same day for RWL investigations.

### 173 ***Stomatal Assay***

174 Stomatal aperture was measured using capsicum epidermal peels from full-expanded top  
175 canopy leaves, according to O’Carrigan *et al.*, (2014). Epidermal peels were attached to 35-  
176 mm glass bottom petri dishes (MatTek Corporation, MA, USA) using silicone adhesive (B-  
177 521, Factor II, InC Lakeside, AZ, USA) and bathed in maintaining solution, referred as ‘MS’  
178 (50 mM KCl, 5 mM MES at pH 6.1 with KOH) for about 20 min. Afterward, epidermal peels  
179 were imaged in MS under a Nikon microscope attached with a camera and a DS-U3  
180 controller (Nikon, Tokyo, Japan). Images of stomatal apertures and sizes were measured and  
181 processed with ImageJ software (National Institute of Health, USA). Stomatal density  
182 investigations followed a simplified method (Schlüter *et al.*, 2003). Nail polish imprints were  
183 taken from the abaxial surface of mature leaves from plants grown under both Control and  
184 SG growth rooms. Stomatal densities were determined by light microscopy from leaf  
185 imprints of at least five individual plants from both SG and Control growth rooms,  
186 respectively. Three independent counts were carried out on each leaf.

187 The method for measuring ABA-induced stomatal aperture changes followed Cai *et al.*,  
188 (2017). Manually collected epidermal peels were incubated in MS for 1 h then rinsed with  
189 measuring buffer, referred as ‘MB’ [10 mM KCl, 5 mM MES at pH 6.1 with Ca(OH)<sub>2</sub>], three  
190 times within 10 min. Epidermal peels were imaged in MB for 10 min under light microscopy  
191 as a control. Then, 100 µM ABA treatment was applied and the peels were imaged for  
192 another 50 min. Images were taken every 5 min and stomatal apertures were measured and  
193 analysed with ImageJ. Thirteen-time points (including 0 min as control) were recorded and  
194 the ratio was used to reflect stomatal aperture changes; 30 to 80 stomata from at least three  
195 independent epidermal peels were analysed. Epidermal peels were collected at 9 am on sunny  
196 days.

### 197 ***Gas exchange measurement***

198 Leaf gas exchange measurements utilised top canopy leaves which were fully exposed to  
199 natural glasshouse light, including net assimilation rate ( $A_{net}$ ) and stomatal conductance ( $g_s$ ),  
200 were measured using a Li-Cor Li-6400XT infrared gas analyser according Liu *et al.*, (2017).  
201 For investigations of light intensity on photosynthetic parameters, gas exchange  
202 measurements were conducted in three stages and took approximately 140 min. The first  
203 stage was established under 1500 µmol m<sup>-2</sup> s<sup>-1</sup> PAR for stabilization (20 min, control stage),  
204 followed by the second stage when the light intensity was reduced to 100 µmol m<sup>-2</sup> s<sup>-1</sup> PAR



205 and maintained for one hour during the measurement. At the initiation of the third stage, the  
206 light intensity was returned to  $1500 \mu\text{mol m}^{-2} \text{s}^{-1}$  PAR and samples were continuously  
207 measured for another one hour. At the control stage, after 20 min measurement, stomatal  
208 conductance became stable and the average value was used for calculating relative stomatal  
209 conductance to the control stage, which reflects the speed of stomatal movements. For  
210 investigations of the blue-light spectrum on stomatal conductance changes, three stages were  
211 employed. During the first stage,  $1500 \mu\text{mol m}^{-2} \text{s}^{-1}$  PAR [ $1350 \mu\text{mol m}^{-2} \text{s}^{-1}$  PAR using red  
212 LED and  $150 \mu\text{mol m}^{-2} \text{s}^{-1}$  PAR using blue LED light (10%)], was employed. After 20 min  
213 measurement, 10% blue light was switched off and samples were continuously measured for  
214 one hour before the third stage, where 10% blue light ratio was returned, and samples were  
215 continuously measured for another one hour. Similarly, average  $g_s$  was calculated and used  
216 for normalizing the relative  $g_s$  changes to the control stage. Gas exchange measurements were  
217 conducted between 9 am to 3 pm on sunny days and four individual capsicum plants were  
218 measured from both SG and Control.

#### 219 ***Stomatal morphological trait measurement and calculation of $g_{max}$***

220 Operating stomatal conductance ( $g_{op}$ ) was measured according to Drake *et al.*, (2013) and  
221 McElwain *et al.*, (2016) with modifications using top canopy capsicum leaves. The  $g_{op}$   
222 measurements were taken in the morning on sunny days with licor-6400XT for measurement  
223 with  $1500 \mu\text{mol m}^{-2} \text{s}^{-1}$  PAR, 70% ambient humidity,  $150 \mu\text{mol m}^{-2} \text{s}^{-1}$  air flow and the  
224 vapour pressure deficit of  $\sim 1$  kPa. It is noted that capsicum stomatal opening phase took  $\sim 100$   
225 min to reach a steady-state  $g_{op}$ .  $g_{op}$  values are means of  $g_{op}$  measurements from four  
226 independent capsicum plants using top canopy leaves from both SG and Control at 60-s  
227 intervals for the data recording procedures. Maximum theoretical stomatal conductance ( $g_{max}$ )  
228 calculation followed Drake *et al.*, (2013) and McElwain *et al.*, (2016) and utilised stomatal  
229 morphological parameters collected based on the stomatal assay:

$$230 \quad g_{max} = (dw/v \cdot SD \cdot pa_{max}) / (pd + \pi/2 \cdot \text{sqrt}(pa_{max}/\pi))$$

231 where  $dw$  = diffusivity of water vapour at  $25^\circ\text{C}$  ( $0.000025 \text{ m}^2 \text{ s}^{-1}$ ) and  $v$  = molar volume of  
232 air ( $0.022 \text{ m}^3 \text{ mol}^{-1}$ ) are both constants McElwain *et al.*, (2016),  $SD$  is stomatal density ( $\text{m}^{-2}$ )  
233 observed from our stomatal assay, stomatal pore sizes ( $\text{m}^2$ ) were calculated as an ellipse using  
234 stomatal pore length (m) as the long axis and  $1/2$  stomatal pore width (m) as the short axis and  
235  $pa_{max}$  (maximum stomatal pore size) was recorded from each replicate among four

236 independent plants;  $pd$  is stomatal pore depth (m) considered to be equivalent to the stomatal  
237 width of an fully turgid guard cell (McElwain *et al.*, 2016).

238 Similarly, stomatal sizes ( $\mu\text{m}^2$ ) were calculated following an ellipse using stomatal length  
239 ( $\mu\text{m}$ ) as the long axis and  $\frac{1}{2}$  stomatal width ( $\mu\text{m}$ ) as the short axis, maximum stomatal sizes  
240 ( $SS_{max}$ ,  $\mu\text{m}^2$ ) were recorded accordingly from each replicates among four independent  
241 capsicum plants. Stomatal opening and closing half-times were calculated from the gas  
242 exchange measurement, where stomatal opening half-time was calculated as the time it took  
243 to reach the maximum stomatal conductance in response to the light transition from  $100 \mu\text{mol}$   
244  $\text{m}^{-2} \text{s}^{-1}$  to  $1500 \mu\text{mol m}^{-2} \text{s}^{-1}$  PAR, and stomatal closing half-time was calculated by the time  
245 capsicum plants took for reaching the minimum stomatal conductance in response to the light  
246 transition from  $1500 \mu\text{mol m}^{-2} \text{s}^{-1}$  to  $100 \mu\text{mol m}^{-2} \text{s}^{-1}$  PAR. Stomatal opening and closing  
247 half-times were recorded from four independent capsicum plants of both SG and Control.

#### 248 ***Guard cell ion fluxes measurement***

249 For guard cell ion flux measurements, the preparation of epidermal peels was identical to the  
250 stomatal bioassay. Net fluxes of  $\text{K}^+$ ,  $\text{Cl}^-$ ,  $\text{Ca}^{2+}$ , and  $\text{H}^+$  were measured using non-invasive,  
251 ion-selective microelectrodes (MIFE) on guard cells of capsicum according to Pornsiriwong  
252 *et al.*, (2017) and Zhao *et al.*, (2019). Specific details related to the MIFE theory, electrode  
253 fabrication and calibration are described in Shabala *et al.*, (2013). Epidermal peels were pre-  
254 treated with MS for 20 min before blue light treatment. The peels were fixed on a coverslip  
255 coated with silicone adhesive and then placed in a long, flat 5 mL measuring chamber  
256 containing MB. Electrodes with fine tips (Resistance = 4 to 6  $\text{G}\Omega$ ) were filled with ion-  
257 selective ionophore cocktails (Sigma, Buchs, Switzerland) and their tips were moved towards  
258 and away from the sample in a slow (5 s cycle, 80  $\mu\text{m}$  amplitude) square-wave by a  
259 computer-driven micromanipulator. Net fluxes of ions from guard cells were calculated from  
260 the measured differences in electrochemical potential for these ions between two positions.  
261 Net  $\text{K}^+$ ,  $\text{Ca}^{2+}$ ,  $\text{H}^+$ , and  $\text{Cl}^-$  fluxes from guard cells were measured for 10 min as a control to  
262 ensure initial, steady values before implementing the blue light treatment and then  
263 measurements were conducted for another 30 to 40 min. At least five individual stomatal  
264 guard cells from independent plants were investigated for ion flux measurements.

#### 265 ***Quantitative real time-PCR***

266 Quantitative real-time PCR was performed as previously described (Chen *et al.*, 2016). We  
267 measured the transcripts of key genes of abaxial epidermal peels of capsicum leaves. The

268 details of tested genes can be found in Table S1. Epidermal peels were collected for gene  
269 expression investigations to minimize the effect of mesophyll cell mRNA and to enrich the  
270 guard cell mRNA (Cai et al., 2017). Fully expanded leaves from the top canopy of four-  
271 month-old capsicum plants were selected for sample collection. Under normal light inside  
272 growth rooms, the epidermal peel was immediately collected and stored in liquid nitrogen.  
273 Total RNA was extracted using a RNeasy Plant Mini Kit (Qiagen, Australia) following the  
274 manufacturer's procedure, and the residual genomic DNA was removed with amplification  
275 grade DNase I (Ambion). First-strand cDNA was synthesized with the SensiFAST Kit  
276 (Bioline, Alexandria, Australia). Fluorescence reflecting target genes expression was  
277 determined by the SensiFAST SYBR No-ROX Kit (Bioline, Australia) using gene-specific  
278 primers (Table S1) by employing a Rotor-Gene Q6000 (Qiagen). qPCR conditions were  
279 composed of three steps of cycling: polymerase activation at 95 °C for 15 min; 40 cycles  
280 were set up for denaturation at 94°C for 15 s, annealing for 15 s at 55 °C, extension at 72 °C  
281 for 15 s; SYBR green signal data were acquired at the end. Ubiquitin-conjugating gene (*UBI-*  
282 *3*) (Wan *et al.*, 2011) was used as the reference for normalization of relative gene expression.  
283 Data were expressed as the average of four independent plants from two research bays with  
284 two technical replicates.

### 285 *Statistical analysis*

286 Statistical significance between SG and Control plants, before and after treatment was  
287 analysed using Student's t-test and SPSS one-way ANOVA test was applied for statistical  
288 analysis of ion flux measurement. All data were presented as means with standard errors.

289

## 290 **Results**

### 291 *Smart glass (SG) reduced stomatal pore size but not stomatal conductance or density*

292 Light conditions are vital for stomatal formation and development. To investigate stomatal  
293 morphological changes induced by SG, we measured stomatal parameters from both control  
294 and SG grown plants. Relative to the control glasshouse bays, application of the SG film  
295 ULR 80 blocked 99% of UV, 58% of far-red, and 26% of red light, along with a 19%  
296 reduction in PAR. The SG chambers appeared light blue and the control chambers appeared  
297 white from the aerial view (Fig. S1A-B). Compared with control plants grown under normal  
298 glass condition, plants grown under SG had similar stomatal conductance (Fig. 1B). However,  
299 SG significantly decreased stomatal pore size ( $P = 0.036$ ) by 13% relative to the control (Fig.  
300 1C), due to reduced stomatal pore length rather than width (Fig. 1A; Table S2). Stomatal size  
301 and density were not statistically different between the control and SG treatments (Fig. 1D-E).  
302 These results partially support our hypothesis that altered light conditions under SG will  
303 reduce stomatal aperture, indicated by decreased stomatal pore size (length) but not stomatal  
304 size or density.

### 305 *SG led to greater leaf water loss, slower ABA-induced stomatal closure and upregulation 306 of ABA signalling genes*

307 Did changes in stomatal morphology observed under SG induce physiological or molecular  
308 changes in the stomatal response? To answer this question, we compared water loss rate  
309 between SG and control plants and subsequently investigated genetic transcripts relating to  
310 ABA signalling networks. During the initial 40 min following leaf detachment, SG and  
311 control plants had similar rates of relative water loss. After 60 min, SG leaves transpired  
312 water faster than control leaves ( $P = 0.012$  at 90 min) (Fig. 2A). Given stomata mediate the  
313 majority of plant water loss, more water loss from leaves of SG plants indicates a change in  
314 stomatal responses. Thus, stomatal closure rate in response to ABA was investigated using  
315 epidermal peels, and the initial stomatal aperture before ABA application was not  
316 significantly different between the control and SG treatments (Fig. 2B). Exogenously applied  
317 ABA caused a slower stomatal closure in SG plants, especially after 40 min of incubation  
318 with ABA (Fig. 2B).

319 We then quantified the expression of genes involved in ABA signalling in epidermal peels.  
320 *PYL8* and *CHLH* are vital ABA receptors whose mutations both lead to severe open stomata  
321 and ABA-insensitive phenotype, whilst overexpression of *PYL8* or *CHLH* leads to high

322 degrees of stomatal closure (Gonzalez-Guzman *et al.*, 2012; Lim *et al.*, 2013; Shen *et al.*,  
323 2006). Relative to the control, there were significant increases (~ 4-6-fold) in *PYL8* and  
324 *CHLH* transcripts (Fig. 2C). Since ROS accumulation has been identified as a central  
325 network component for stomatal closure (Sierla *et al.*, 2016), core genes encoding ROS  
326 metabolism were also investigated [e.g. SOD catalyses the decomposition of hydrogen  
327 peroxide (H<sub>2</sub>O<sub>2</sub>), the GTP binding protein ADP-ribosylation factor 1 (ARF1) (Dana *et al.*,  
328 2000)]. SG generated a four-fold upregulation of *SOD*, and *ARF1* expression was enhanced  
329 by 5-fold in SG compared to the control (Figs 2C and S4). However, the SG treatment  
330 showed no significant effect on the expression of *Catalase 3* (*CAT3*), which catalyses the  
331 breakdown of H<sub>2</sub>O<sub>2</sub> into water and oxygen (Fig. S4). Finally, the expression of *SLAC1*,  
332 whose protein contributes to stomatal closure (Deger *et al.*, 2015), was four-fold higher in SG  
333 compared to control epidermal peels (Fig. 2C). Taken together, these results support our  
334 hypothesis that SG will affect stomatal sensitivity to water stress and ABA-mediated  
335 signalling processes.

### 336 ***SG stomata responded faster to light transitions without changes in $SS_{max}$ , $g_{max}$ or $g_{op}$***

337 To investigate if the SG treatment has altered stomatal sensitivity, we measured changes in  
338 stomatal aperture in response to light transitions from 1500 to 100  $\mu\text{mol m}^{-2} \text{s}^{-1}$  PAR (Fig.  
339 3A). On average, stomata of SG plants showed lower opening and closing half-times relative  
340 to the control (Fig. 3B). In particular, SG stomata closed faster in response to the transition to  
341 low (100  $\mu\text{mol m}^{-2} \text{s}^{-1}$ ) PAR, and opened faster in response to the subsequent transition to  
342 high PAR (1500  $\mu\text{mol m}^{-2} \text{s}^{-1}$ ) (Figs 3A-B). After 140 min of both light transitions, stomatal  
343 conductance was significantly higher in SG relative to control plants (Fig. 3A, Table S2, P <  
344 0.01).

345 Given the clear link between light conditions and stomatal development (Fu *et al.*, 2010;  
346 O’Carrigan *et al.*, 2014), we correlated stomatal parameters with maximum theoretical  
347 stomatal conductance ( $g_{max}$ ) and operational stomatal conductance ( $g_{op}$ ). SG and control  
348 plants maintained similar  $g_{op}$  and  $g_{max}$  (Table S2). The relationship between  $g_{op}$  and  $g_{max}$  was  
349 steeper in SG than control plants (Fig. 3C). Both treatments showed parallel relationships  
350 between opening and closing half-times with  $g_{max}$  (Fig. 3D-E) and  $g_{op}$  (Fig. S3C-D). The  
351 maximal stomatal size ( $SS_{max}$ ) also showed similar relations with  $g_{op}$  in both treatments (Fig.  
352 S3A-B). Overall, SG produced more active stomata in response to light intensity changes  
353 with smaller aperture, but not size, supporting our hypothesis that stomatal sensitivity to light  
354 conditions will increase due to the altered light condition under SG.

355 ***SG enhanced expression of photoreceptor and photosynthesis genes in epidermal peels***

356 Stomatal conductance was investigated in response to changes in blue light fraction, which is  
357 required for inducing stomatal opening (Inoue and Kinoshita, 2017). SG and control plants  
358 responded similarly to blue light (Fig. 4A). During the measurement, there were no  
359 differences in stomatal conductance under 1500  $\mu\text{mol m}^{-2} \text{s}^{-1}$  PAR (Fig. 4B). Removing 10%  
360 blue light (1350  $\mu\text{mol m}^{-2} \text{s}^{-1}$  PAR) generally induced stomatal closure in both SG and control  
361 leaves, while the retrieval of 10% blue-light increased stomatal conductance similarly in both  
362 treatments (Fig. 4B). Accordingly, our hypothesis about increased stomatal sensitivity to blue  
363 light under SG is rejected.

364 Capsicum leaf epidermal peels were used to assess the expression of photoreceptor and  
365 photosynthesis associated genes such as *PHOT1*, *PHYA*, and *RBCS1*. Compared with the  
366 control, SG grown plants had enhanced gene expression by 75% in *PHOT1*, 300% in *PHYA*  
367 and 165% in *RBCS1* (Figs 4 C and S4). Further, SG plants exhibited increased gene  
368 expression of *UV light response element (UVRB)* and *UVR8* relative to control plants (Fig.  
369 4C). These are crucial genes regulating photosynthesis and differential gene expression  
370 patterns between SG and control plants, indicating that a different factor was deployed by SG  
371 plants to adapt to changed light conditions. Overall, SG stomata maintain a higher sensitivity  
372 to light at physiological and molecular levels under glasshouse conditions.

373 **Higher guard cell flux of  $\text{K}^+$ ,  $\text{Ca}^{2+}$ , and  $\text{Cl}^-$  is induced by SG but suppressed by blue**  
374 **light**

375 Stomatal opening and closing are regulated by ion fluxes across membranes of guard cells.  
376 We investigated ion fluxes from guard cells of both treatments. In normal light, guard cells  
377 from SG plants showed approximately three times greater efflux of  $\text{K}^+$  and  $\text{Cl}^-$  compared to  
378 control plants (Fig. 5A and D), which reduced stomatal aperture and contributed to closure.  
379 The  $\text{Ca}^{2+}$  influx of guard cells from SG plants was about two times higher than that from  
380 control plants (Fig. 5B). The  $\text{H}^+$  efflux of guard cells was similar between SG and control  
381 plants under normal light (Fig. 5C).

382 Blue light significantly suppressed  $\text{K}^+$  efflux of guard cells by 35% in control and 53% in SG  
383 plants (Fig. 5A). Moreover, blue light also suppressed  $\text{Cl}^-$  efflux by 72% in SG and 28% in  
384 control plants (Fig. 5D). Meanwhile,  $\text{Ca}^{2+}$  influxes were suppressed by 41% and 60% in  
385 control and SG, respectively (Fig. 5B). In contrast, blue light slightly induced  $\text{H}^+$  efflux in the  
386 control treatment, but slightly suppressed  $\text{H}^+$  efflux in SG, indicating similar effects on SG

387 and control plants guard cells (Fig. 5C). Overall, SG epidermal peels indicated enhanced  
388 solutes loss under normal light condition but maintains ability to response to blue light. This  
389 agrees with our hypothesis that long-term altered light conditions under SG will affect guard  
390 cell ion fluxes determining stomatal status.



## 391 **Discussion**

392 In this study, we compared stomatal functions in upper canopy leaves from capsicum plants  
393 grown under SG and control lighting environment. Our results can be categorised into four  
394 main findings. Firstly, SG reduced stomatal pore size and increased guard cell fluxes ( $K^+$ ,  $Cl^-$   
395 efflux, and  $Ca^{2+}$  influx) and the expression levels of *SLAC1* involved mechanism of cellular  
396 ion homeostasis without appreciably affecting  $g_s$ ,  $g_{op}$ ,  $g_{max}$ , stomatal size or density. Secondly,  
397 SG reduced stomatal sensitivity to ABA, leading to relatively more water loss in detached  
398 leaves, and this response was underpinned by upregulation of ABA (*PYL8* and *CHLH*) and  
399 ROS (*SOD1* and *ARF1*) related genes. Thirdly, SG stomata responded faster to PAR  
400 transitions, such that stomatal opening and closing speed was proportional to  $g_{max}$ , whilst the  
401 relationship between  $g_{op}$  and  $g_{max}$  was steeper in SG plants. Fourthly, even though SG filtered  
402 out light most efficiently in the blue spectrum, dependence of stomatal conductance on blue  
403 light was similar between SG and control treatments. Yet, guard cell fluxes showed  
404 selectively greater ( $K^+$  and  $Ca^{2+}$ ) or different ( $H^+$ ) blue light sensitivities in the SG plants, and  
405 this was associated with increased expression of photoreceptor genes (*PHOT1* and *PHYA*)  
406 and UV-B light response genes (*UVRB*, *UVR8*). Combining all these findings, SG light  
407 condition did not impair stomatal ability to respond to light changes of capsicum leaves;  
408 instead, the adaptation of SG capsicum stomata to the altered light condition involved a more  
409 active response to PAR changes, ABA signalling, and solutes loss to maintain a decreased  
410 stomatal pore size under SG light condition.

411

## 412 **Decreased stomatal pore area in SG is underpinned by enhanced guard cell solute loss** 413 **and anion channel activity rather than changes in stomatal morphology**

414 Stomata regulates plant water-use efficiency by affecting  $CO_2$  uptake and photosynthesis as  
415 well as transpiration (Brodribb *et al.*, 2009). Under low light conditions, where light  
416 reception is limited, full stomatal opening may not be necessary for photosynthesis  
417 (Pasternak and Wilson, 1973). A study in sweet pepper suggests that partial shade induced  
418 lower stomatal aperture (Jaimez and Rada, 2011). Under SG, where the light intensity was  
419 lower than in the control, stomatal pore sizes were significantly smaller in SG than control  
420 leaves, due to decreased stomatal pore length (Fig. 1C). We found that there was no  
421 difference in stomatal density between SG and control plants (Fig. 1E). Moreover, no



422 significant difference was observed in most of the stomatal morphological parameters (Table  
423 S1), suggesting that ion flux changes may affect the stomatal aperture.

424 Stomatal opening requires activation of potassium inward channels, such as KAT1, KAT2  
425 (Ronzier *et al.*, 2014), and AKT1 (Nieves-Cordones *et al.*, 2012), as well as decreased  
426 channel activities of potassium outward channel GORK (Hosy *et al.*, 2003). SLAC1 plays a  
427 vital role in regulating stomatal response to light (Hiyama *et al.*, 2017), CO<sub>2</sub> (Lind *et al.*,  
428 2015), and humidity (Vahisalu *et al.*, 2008); stomatal closure in response to drought (Geiger  
429 *et al.*, 2009), salinity (Qiu *et al.*, 2016), and darkness (Merilo *et al.*, 2013). Here, SG stomata  
430 exhibited significantly higher guard cell efflux of K<sup>+</sup> and Cl<sup>-</sup>, which suggests that SG plants  
431 close stomata more rapidly than control plants (Fig. 5A and D). Compared with control, SG  
432 plants take up about twice more Ca<sup>2+</sup> into guard cells (Fig. 5B), which is in agreement with  
433 other studies which showed that increased cytosolic Ca<sup>2+</sup> activates anion channel (Asano *et al.*  
434 *et al.*, 2012), deactivates potassium inward channels (Ronzier *et al.*, 2014) for stomatal closure  
435 (Asano *et al.*, 2012; Zhao *et al.*, 2018). In our study, the higher guard cell efflux of K<sup>+</sup> and Cl<sup>-</sup>  
436 and Ca<sup>2+</sup> influx under SG reduces cell turgor, thereby decreasing stomatal pore area. SG  
437 plants also showed significantly higher expression of *SLAC1* responsible for Cl<sup>-</sup> efflux  
438 (Brandt *et al.*, 2012), and higher expression of ABA receptor genes (Fig. 2C). Hence, we  
439 propose that SG-induced prolonged low light conditions may increase solute loss, leading to a  
440 decrease in stomatal pore area and reduced stomatal conductance.

441

#### 442 **SG decreased stomatal sensitivity to exogenously applied ABA due to up-regulated ABA** 443 **signalling leading to higher water loss from capsicum leaves**

444 Sensing adverse environments and producing ABA for closing stomata has been well  
445 established during plant evolution (Lind *et al.*, 2015), and the speed for closing stomata  
446 reflects the plant's ability to adapt to a new environment (Pantin *et al.*, 2013; Wang and Chen,  
447 2020). A higher relative water loss rate in SG leaves and stomata on plants grown under SG  
448 do not open as wide and close more slowly due to the ABA application, indicating that a  
449 modified acclimation mechanism for closing stomata developed in plants grown in SG.

450 We investigated transcripts of the critical components of ABA signalling networks. The  
451 ABA-induced signalling network consists of critical components, including ABA receptors  
452 (Gonzalez-Guzman *et al.*, 2012; Merilo *et al.*, 2013), ROS production (An *et al.*, 2008), Ca<sup>2+</sup>  
453 signalling (Asano *et al.*, 2012; Ronzier *et al.*, 2014) and regulation of ion channels (Deger *et*

454 *al.*, 2015; Hosal *et al.*, 2003; Vahisalu *et al.*, 2008). In our study, SG increased expression of  
455 ABA receptor gene *PYL8* and ABA signalling genes *CHLH* and *ARF1* (Figs 2C and S4),  
456 indicating their roles are affected by SG (Liu *et al.*, 2013; Mishra *et al.*, 2006). *SOD1*  
457 functions as a strong ROS remover in plants, which also affects stomatal activity through  
458 ROS accumulation (An *et al.*, 2008; Jannat *et al.*, 2011; Jiang and Yang, 2009). Therefore,  
459 the upregulated gene expression of *SOD1* may suggest ROS accumulation in SG guard cells  
460 as part of the SG affected ABA signalling (Figs 2C and S4) to regulate anion channels for  
461 stomatal closure (Sierla *et al.*, 2016; Zhao *et al.*, 2018). This was confirmed by increased  
462 expression of *SLAC1* in SG plants, enhanced guard cell Cl<sup>-</sup> efflux, and the slow stomatal  
463 response to exogenous ABA treatment. As the ABA induced stomatal signalling elements  
464 were already enhanced, exogenously applied ABA failed to induce further significant  
465 stomatal closure in SG plants, leading to a higher water loss rate in SG detached leaves.

466

467 **Faster SG-induced stomatal response to light transitions correlates with  $g_{max}$  without**  
468 **affecting photosynthesis rate**

469 Stomatal morphology (e.g. stomatal size), stomatal conductance, and photosynthesis rate are  
470 linked to  $g_{max}$  and  $g_{op}$  (Drake *et al.*, 2013), such that faster stomatal reaction speed to light  
471 increases  $g_{op}$ , thereby improving photosynthesis and water use efficiency (Lawson and  
472 Matthews, 2020). We found that SG stomata exhibited faster response rate to light transitions  
473 and these rates were linearly correlated with  $g_{max}$ . Further analysis showed that SG plants had  
474 a narrow range of  $g_{max}$ , even though averages of  $g_{max}$  and  $g_{op}$  were not affected by SG. Low  
475 PAR generally reduces stomatal conductance and net photosynthetic rate (Farquhar and  
476 Sharkey, 1982; Pasternak and Wilson, 1973; Roelfsema and Hedrich, 2005). This is also  
477 supported by a previous study, where capsicum plants grown in low light conditions (20% of  
478 control) had reduced stomatal index and CO<sub>2</sub>-saturated photosynthesis rate (Fu *et al.*, 2010).  
479 Here, we found that SG plants exhibited a decreased  $g_{max}$  range and produced slightly smaller  
480 stomata, which partly agrees with the above findings. However, SG did not significantly  
481 affect net photosynthetic rate (Fig. S2), which may be due to a similar  $g_{op}$  range and relatively  
482 high  $g_{max}$ .

483 The ‘smaller but faster stomata’ theory was supported by a multi-species study which found  
484 that smaller stomata were usually associated with faster stomatal dynamics (Drake *et al.*,  
485 2013; Franks and Beerling, 2009), was summarised in a recent review (Lawson and

486 Vialet-Chabrand, 2019). Evolution of faster stomatal response promoted expansion of  
487 grasses (Chen *et al.*, 2017), leading to higher plant productivity, efficiency and fitness  
488 (Lawson and Vialet-Chabrand, 2019). In our study, SG plants exhibited smaller stomatal  
489 pore size as well as faster opening and closing speed in response to light transitions between  
490 1500  $\mu\text{mol m}^{-2} \text{s}^{-1}$  PAR to 100  $\mu\text{mol m}^{-2} \text{s}^{-1}$  PAR, which validate the ‘smaller but faster  
491 stomata’ theory (Drake *et al.*, 2013) in a greenhouse horticultural crop.

492

### 493 **Enhanced expression of light responsive genes underpins the effects of SG on capsicum**

494 Photoreceptors are closely linked with plasma membrane transport, determining plant ionic  
495 balance, affecting plant growth, development, and yield (Babla *et al.*, 2019). PHOT1 and  
496 PHOT2 were reported to regulate membrane transport via regulating cytosolic  $\text{Ca}^{2+}$  in plants  
497 (Briggs and Christie, 2002). Further evidence suggests that PHOT1 joins blue light induced  
498  $\text{Ca}^{2+}$  influx to the cytoplasm and therefore affects significant changes of  $\text{Ca}^{2+}$  and  $\text{H}^+$  fluxes  
499 (Babourina *et al.*, 2002). In our study, SG plants showed upregulation of *PHOT1* along with  
500 increased  $\text{Ca}^{2+}$  influx. SG reduces 99% of UV light into the greenhouse bays, which also  
501 induced a significantly higher expression of UVR8 (Fig. 4C). In *Arabidopsis*, UVR8 plays  
502 important roles in UV light induced stomatal closure by a mechanism involving both  $\text{H}_2\text{O}_2$   
503 and NO generation in guard cells (Tossi *et al.*, 2014). This further supports our observations  
504 of a higher basal level of expression of light responsive genes in SG shows that stomata  
505 maintain full capacity to respond to light alternations.

506 To confirm previously reported blue light induced stomatal opening case studies, where  
507 crucial ion channels, such as  $\text{K}^+$  (Takahashi *et al.*, 2013),  $\text{Ca}^{2+}$  (Ronzier *et al.*, 2014),  $\text{H}^+$   
508 (Inoue and Kinoshita, 2017) and  $\text{Cl}^-$  (Hiyama *et al.*, 2017), were regulated by blue light, we  
509 measured dynamic stomatal conductance during blue light transitions and ion flux changes in  
510 response to blue light with no red light background. SG plants exhibited a suppression of  $\text{K}^+$   
511 and  $\text{Cl}^-$  effluxes and  $\text{Ca}^{2+}$  influx (Fig. 5). Absence of blue light slightly decreased stomatal  
512 conductance in both SG and control plants, whilst blue light retrieval mildly increased  
513 stomatal conductance (Fig. 4B), indicating the key role of blue light in stomatal opening in  
514 capsicum (Inoue and Kinoshita, 2017). However, compared with the light retrieval-induced  
515 stomatal dynamic changes (Fig. 3A), SG plants stomata obviously responded more actively to  
516 light intensity than blue light spectrum (Figs 3A-B and 4A). Overall, SG plants maintain a  
517 similar capacity of responding to blue light spectrum but more actively respond to light

518 intensity relative to the control, and this is highly linked with the increased expression of light  
519 responsive genes (Fig. 4C).

## 520 **Conclusions**

521 Altered light condition in SG did not lead to strong stomatal morphological changes but  
522 decreased stomatal aperture, which is the consequence of vigorously activated ABA and light  
523 signalling networks as well as  $\text{Ca}^{2+}$  influx and  $\text{K}^+$  and  $\text{Cl}^-$  effluxes from SG guard cells (Fig.  
524 6). Interestingly, SG grown plants presented a faster and stronger stomatal recovery when  
525 high illumination condition was retrieved, and this was due to the smaller stomatal pore sizes.  
526 The faster stomatal response to light may contribute to optimising capsicum photosynthesis  
527 under SG light conditions. The current study not only provides valuable physiological  
528 implications of SG material on capsicum farming in controlled environment horticulture, but  
529 also reveals that SG films could potentially be suitable materials for growing capsicum  
530 particularly in the southern hemisphere countries, such as Australia.

531

## 532 **Authors contributions**

533 DT, ZHC, CIC and OG designed the Smart Glass experiment that supported this project. The  
534 project was conceived by CZ, ZHC and OG. CZ and SC performed experimental research  
535 and data analyses. CZ, ZHC, OG, DT, and CIC wrote the manuscript with contributions from  
536 all co-authors.

537

## 538 **Acknowledgments**

539 We thank Dr. Wei Liang for crop growth and management, Ms Chelsea Maier for technical  
540 operation and maintenance of the glasshouse, and Dr. Craig Barton for the technical support  
541 with Licor 6400XT measurements. We also thank Dr. Juan Zhu from Tasmanian Institute of  
542 Agriculture, University of Tasmania for her suggestions on data analysis.

543

## 544 **Funding**

545 This work was financially supported by the National Vegetable Protected Cropping Centre  
546 and Horticulture Innovation Australia projects VG16070 and VG17003. CZ was supported by  
547 the Australian Indian Institute (AII) New Generation Network (NGN) fellowship. OG was

548 partially funded by the Australian Research Council through the Centre of Excellence for  
549 Translational Photosynthesis (CE1401000015).

550

551 **Declaration of conflict for interest**

552 No conflict of interest is declared.

553 **Figure legends**

554 **Fig 1. Effect of smart glass (SG) on stomatal traits of capsicum.** (A) representative  
555 stomatal photos collected from epidermal peels of both control and SG. Scale bar = 20  $\mu\text{m}$  (B)  
556 stomatal conductance in the Control and SG under control conditions (1500 PAR at initial  
557 stable stage). (C-E) stomatal pore size, stomatal size and stomatal density in the control and  
558 SG (n=5 biological replicate with 50-80 stomata). Values are means  $\pm$  SE. \*P<0.05.

559

560 **Fig 2. Smart glass (SG) alters relative water loss, ABA-induced stomatal closure, and**  
561 **expression of genes of ABA signalling in capsicum.** (A) relative water loss was calculated  
562 based on the mass loss every ten min. Values are means  $\pm$  SE (n=5). (B) stomatal response to  
563 exogenous 100  $\mu\text{M}$  ABA. Data are mean  $\pm$  SE (n=4 biological replicates from 30 to 80  
564 stomata). (C) relative expression of genes of ABA signalling from epidermis. *Pyrabactin*  
565 *resistance8* (*PYL8*), *Mg-chelatase H subunit* (*CHLH*); *superoxide dismutase* (*SOD*) and *slow*  
566 *anion channel-associated 1* (*SLAC1*). Data are means  $\pm$  SD (n=4 biological replicates with 2  
567 technical replicates). \*P<0.05; \*\*P<0.01.

568

569 **Fig 3. Effect of smart glass (SG) on stomatal sensitivity to light transitions in capsicum.**  
570 (A) Stomatal conductance was initially stabilized and recorded under 1500 PAR then reduced  
571 to 100 PAR for 1 hour and followed by 1500 PAR for another 1 h. The averaged stomatal  
572 conductance value from the initial 20 min was used for normalizing stomatal conductance  
573 ratios to the initial control stage. (B) half stomatal opening time ( $t_{1/2o}$ ) and half stomatal  
574 closure time ( $t_{1/2c}$ ) in response to light transitions. (C-E) correlation analysis between  
575 maximum theoretical stomatal conductance ( $g_{max}$ ) and operational stomatal conductance ( $g_{op}$ )  
576 and stomatal opening and closing half-times ( $t_{1/2}$ ). Data are means  $\pm$  SE (n=4). \*P<0.05;  
577 \*\*P<0.01.

578

579 **Fig 4. Smart glass (SG) induces different stomatal responses to blue light and gene**  
580 **expression in capsicum.** (A) stomatal conductance was monitored in three light conditions:  
581 normal light (1500 PAR: 1350 Red + 150 Blue) for 20 min, 1350 Red PAR for 1 hour, and  
582 normal light for another 1 h. The averaged stomatal conductance value from the initial 20  
583 min measurement was used for normalizing stomatal conductance ratios. (B), bar graphs are  
584 three points of the end of each light condition. Data are means  $\pm$  SE (n=4) (C) gene  
585 expression of *Phototropin 1* (*PHOT1*), *Phytochrome A* (*PHYA*), *UV response elements*  
586 (*UVRB*) and *UV-B Receptor 8* (*UVR8*). Data are means  $\pm$  SE (n=4 biological replicates with 2  
587 technical replicates). \*P<0.05; \*\*P<0.01.

588

589 **Fig 5 Smart glass (SG) affects ion fluxes and their regulation by blue light in guard cell**  
590 **of capsicum.** Net fluxes of  $\text{K}^+$  (A),  $\text{Ca}^{2+}$  (B),  $\text{H}^+$  (C) and  $\text{Cl}^-$  (D) were recorded from guard  
591 cells in leaf epidermal peels. Data are means  $\pm$  SE (n=5 to 7 plants). Different lowercase  
592 letters represent the statistical difference.

593

594 **Fig 6 Schematic summary of smart glass (SG)-induced low light condition on guard cell**  
595 **signalling network in capsicum.** Under prolonged low light conditions, ABA reception was  
596 highly upregulated, leading to the ROS accumulation in guard cells. ROS activated  $\text{Ca}^{2+}$   
597 influx and thus induced cytosolic  $\text{Ca}^{2+}$  accumulation in guard cells. Accumulated ROS and

598  $\text{Ca}^{2+}$  suppressed  $\text{K}^+$  inward channels AKT1/KAT1 and activated slow anion channels  
599 SLAC1(Brandt *et al.*, 2012) and  $\text{K}^+$  outward channel GORK. Besides, photosynthesis related  
600 genes also play roles in inducing stomatal closure by accumulating starch in guard cells.

601

602

### 603 **Supplementary Information**

604 **Fig S1.** Mechanism of smart glass material and an external view of the greenhouse fitted with  
605 SG.

606

607 **Fig S2.** Effect of smart glass (SG) on net photosynthetic rate of capsicum under light  
608 alternations.

609

610 **Fig S3.** Correlation analysis of the effect of smart glass (SG) on the maximum theoretical  
611 stomatal conductance ( $g_{max}$ ), maximum stomatal sizes ( $SS_{max}$ ), stomatal opening and closing  
612 half-times ( $t_{1/2}$ ) with operational stomatal conductance ( $g_{op}$ ) of capsicum.

613

614 **Fig S4** Relative expression of genes relevant to ABA signalling, ROS metabolism and  
615 photosynthesis in capsicum epidermal peels under control and smart glass (SG).

616

617 **Table S1** Primers and gene information in the quantitative RT-PCR experiment.

618

619 **Table S2.** Comparison of stomatal traits, gas exchange parameters, and ion fluxes of  
620 capsicum between control and smart glass (SG) conditions.



## References

- Aasamaa K, Söber A.** 2011. Stomatal sensitivities to changes in leaf water potential, air humidity, CO<sub>2</sub> concentration and light intensity, and the effect of abscisic acid on the sensitivities in six temperate deciduous tree species. *Environmental and Experimental Botany* **71**, 72-78.
- An Z, Jing W, Liu Y, Zhang W.** 2008. Hydrogen peroxide generated by copper amine oxidase is involved in abscisic acid-induced stomatal closure in *Vicia faba*. *Journal of Experimental Botany* **59**, 815-825.
- Asano T, Hayashi N, Kikuchi S, Ohsugi R.** 2012. CDPK-mediated abiotic stress signaling. *Plant Signaling & Behavior* **7**, 817-821.
- Assmann S, Jegla T.** 2016. Guard cell sensory systems: recent insights on stomatal responses to light, abscisic acid, and CO<sub>2</sub>. *Current Opinion in Plant Biology* **33**, 157-167
- Babla M, Cai S, Chen G, Tissue DT, Cazzonelli CI, Chen ZH.** 2019. Molecular evolution and interaction of membrane transport and photoreception in plants. *Frontiers in Genetics* **10**, 956.
- Babourina O, Newman I, Shabala S.** 2002. Blue light-induced kinetics of H<sup>+</sup> and Ca<sup>2+</sup> fluxes in etiolated wild-type and phototropin-mutant *Arabidopsis* seedlings. *Proceedings of the National Academy of Sciences* **99**, 2433-2438.
- Bakker J.** 1989a. The effects of air humidity on flowering, fruit set, seed set and fruit growth of glasshouse sweet pepper (*Capsicum annuum L.*). *Scientia Horticulturae* **40**, 1-8.
- Bakker J.** 1989b. The effects of temperature on flowering, fruit set and fruit development of glasshouse sweet pepper (*Capsicum annuum L.*). *Journal of Horticultural Science* **64**, 313-320.
- Ballard T, Peak D, Mott K.** 2019. Blue and red light effects on stomatal oscillations. *Functional Plant Biology* **46**, 146-151.
- Baroli I, Price GD, Badger MR, von Caemmerer S.** 2008. The contribution of photosynthesis to the red light response of stomatal conductance. *Plant Physiology* **146**, 737-747.
- Borkowska B.** 2005. The photosynthetic activity of plants growing under different environmental conditions. *International Journal of Fruit Science* **5**, 3-16.
- Brandt B, Brodsky DE, Xue S, Negi J, Iba K, Kangasjärvi J, Ghassemian M, Stephan AB, Hu H, Schroeder JI.** 2012. Reconstitution of abscisic acid activation of SLAC1 anion channel by CPK6 and OST1 kinases and branched ABI1 PP2C phosphatase action. *Proceedings of the National Academy of Sciences* **109**, 10593-10598.
- Briggs WR, Christie JM.** 2002. Phototropins 1 and 2: versatile plant blue-light receptors. *Trends in Plant Science* **7**, 204-210.
- Brodribb TJ, McAdam SA, Jordan GJ, Feild TS.** 2009. Evolution of stomatal responsiveness to CO<sub>2</sub> and optimization of water - use efficiency among land plants. *New Phytologist* **183**, 839-847.
- Cai S, Chen G, Wang Y, Huang Y, Marchant DB, Wang Y, Yang Q, Dai F, Hills A, Franks PJ.** 2017. Evolutionary conservation of ABA signaling for stomatal closure. *Plant Physiology* **174**, 732-747.



- Casal JJ.** 2013. Photoreceptor signaling networks in plant responses to shade. *Annual Review of Plant Biology* **64**, 403-427.
- Chavan SG, Maier C, Alagoz Y, Filipe JC, Warren CR, Lin H, Jia B, Loik ME, Cazzonelli CI, Chen Z.** 2020. Light limited photosynthesis under energy-saving film decreases eggplant yield. *ESSOAr* doi: 10.1002/essoar.10502325.1
- Chen ZH, Chen G, Dai F, Wang Y, Hills A, Ruan Y-L, Zhang G, Franks PJ, Nevo E, Blatt MR.** 2017. Molecular evolution of grass stomata. *Trends in Plant Science* **22**, 124-139.
- Chen ZH, Wang Y, Wang JW, Babla M, Zhao C, García - Mata C, Sani E, Differ C, Mak M, Hills A.** 2016. Nitrate reductase mutation alters potassium nutrition as well as nitric oxide - mediated control of guard cell ion channels in *Arabidopsis*. *New Phytologist* **209**, 1456-1469.
- Dana RR, Eigsti C, Holmes KL, Leto TL.** 2000. A regulatory role for ADP-ribosylation factor 6 (ARF6) in activation of the phagocyte NADPH oxidase. *Journal of Biological Chemistry* **275**, 32566-32571.
- Davey MP, Susanti NI, Wargent JJ, Findlay JE, Quick WP, Paul ND, Jenkins GI.** 2012. The UV-B photoreceptor UVR8 promotes photosynthetic efficiency in *Arabidopsis thaliana* exposed to elevated levels of UV-B. *Photosynthesis Research* **114**, 121-131.
- Deger AG, Scherzer S, Nuhkat M, Kedzierska J, Kollist H, Brosché M, Unyayar S, Boudsocq M, Hedrich R, Roelfsema MRG.** 2015. Guard cell SLAC1-type anion channels mediate flagellin - induced stomatal closure. *New Phytologist* **208**, 162-173.
- Devireddy AR, Zandalinas SI, Gómez-Cadenas A, Blumwald E, Mittler R.** 2018. Coordinating the overall stomatal response of plants: Rapid leaf-to-leaf communication during light stress. *Sci Signal.* **11**, eaam9514.
- Drake PL, Froend RH, Franks PJ.** 2013. Smaller, faster stomata: scaling of stomatal size, rate of response, and stomatal conductance. *Journal of Experimental Botany* **64**, 495-505.
- Düring H, Harst M.** 2015. Stomatal behaviour, photosynthesis and photorespiration of in vitro-grown grapevines: effects of light and CO<sub>2</sub>. *VITIS-Journal of Grapevine Research* **35**, 163.
- Farquhar GD, Sharkey TD.** 1982. Stomatal conductance and photosynthesis. *Annual Review of Plant Physiology* **33**, 317-345.
- Franks PJ, Beerling DJ.** 2009. Maximum leaf conductance driven by CO<sub>2</sub> effects on stomatal size and density over geologic time. *Proceedings of the National Academy of Sciences* **106**, 10343-10347.
- Fu Q, Zhao B, Wang Y, Ren S, Guo Y.** 2010. Stomatal development and associated photosynthetic performance of capsicum in response to differential light availabilities. *Photosynthetica* **48**, 189-198.
- Gay A, Hurd R.** 1975. The influence of light on stomatal density in the tomato. *New Phytologist* **75**, 37-46.
- Geiger D, Scherzer S, Mumm P, Stange A, Marten I, Bauer H, Ache P, Matschi S, Liese A, Al-Rasheid KA.** 2009. Activity of guard cell anion channel SLAC1 is controlled by drought-stress signaling kinase-phosphatase pair. *Proceedings of the National Academy of Sciences* **106**, 21425-21430.

- Gonzalez-Guzman M, Pizzio GA, Antoni R, Vera-Sirera F, Merilo E, Bassel GW, Fernández MA, Holdsworth MJ, Perez-Amador MA, Kollist H.** 2012. Arabidopsis PYR/PYL/RCAR receptors play a major role in quantitative regulation of stomatal aperture and transcriptional response to abscisic acid. *The Plant Cell* **24**, 2483-2496.
- Hawa Z.** 2003. Effects of water stress on anthesis and flower abscission in the glasshouse sweet pepper (*Capsicum annuum L.*). *Malaysian Society of Plant Physiology* **12**, 108-116
- Hemming S, Waaijenberg D, Campen JB, Bot GP.** 2004. Development of a greenhouse system for tropical lowland in Indonesia. *Acta Horticulturae* **710**, 135-142.
- Hiyama A, Takemiya A, Munemasa S, Okuma E, Sugiyama N, Tada Y, Murata Y, Shimazaki KI.** 2017. Blue light and CO<sub>2</sub> signals converge to regulate light-induced stomatal opening. *Nature communications* **8**, 1-13.
- Hosy E, Vavasseur A, Mouline K, Dreyer I, Gaymard F, Porée F, Boucherez J, Lebaudy A, Bouchez D, Véry AA.** 2003. The Arabidopsis outward K<sup>+</sup> channel GORK is involved in regulation of stomatal movements and plant transpiration. *Proceedings of the National Academy of Sciences* **100**, 5549-5554.
- Inoue SI, Kinoshita T.** 2017. Blue light regulation of stomatal opening and the plasma membrane H<sup>+</sup>-ATPase. *Plant Physiology* **174**, 531-538.
- Jaimez RE, Rada F.** 2011. Gas exchange in sweet pepper (*Capsicum chinense Jacq*) under different light conditions. *Journal of Agricultural Science* **3**, 134.
- Jannat R, Uraji M, Morofuji M, Islam MM, Bloom RE, Nakamura Y, McClung CR, Schroeder JI, Mori IC, Murata Y.** 2011. Roles of intracellular hydrogen peroxide accumulation in abscisic acid signaling in Arabidopsis guard cells. *Journal of Plant Physiology* **168**, 1919-1926.
- Jiang L, Yang H.** 2009. Prometryne-induced oxidative stress and impact on antioxidant enzymes in wheat. *Ecotoxicology and Environmental Safety* **72**, 1687-1693.
- Katsoulas N, Bartzanas T, Boulard T, Mermier M, Kittas C.** 2006. Effect of vent openings and insect screens on greenhouse ventilation. *Biosystems Engineering* **93**, 427-436.
- Lawson T, Matthews J.** 2020. Guard cell metabolism and stomatal function. *Annual Review of Plant Biology* **71**, 30.
- Lawson T, Viallet-Chabrand S.** 2019. Speedy stomata, photosynthesis and plant water use efficiency. *New Phytologist* **221**, 93-98.
- Lefers R, Bettahalli NMS, Nunes SP, Fedoroff N, Davies PA, Leiknes T.** 2016. Liquid desiccant dehumidification and regeneration process to meet cooling and freshwater needs of desert greenhouses. *Desalination and Water Treatment* **57**, 23430-23442.
- Lim CW, Baek W, Han SW, Lee SC.** 2013. Arabidopsis PYL8 plays an important role for ABA signaling and drought stress responses. *The Plant Pathology Journal* **29**, 471-476.
- Lin KT, Lin H, Jia B.** 2020. Plasmonic nanostructures in photodetection, energy conversion and beyond. *Nanophotonics* **9**, 3135-3163.
- Lind C, Dreyer I, López-Sanjurjo EJ, von Meyer K, Ishizaki K, Kohchi T, Lang D, Zhao Y, Kreuzer I, Al-Rasheid KA.** 2015. Stomatal guard cells co-opted an ancient ABA-dependent desiccation survival system to regulate stomatal closure. *Current Biology* **25**, 928-935.

- Liu X, Fan Y, Mak M, Babla M, Holford P, Wang F, Chen G, Scott G, Wang G, Shabala S.** 2017. QTLs for stomatal and photosynthetic traits related to salinity tolerance in barley. *BMC Genomics* **18**, 9.
- Liu X, Zhang H, Zhao Y, Feng Z, Li Q, Yang H-Q, Luan S, Li J, He ZH.** 2013. Auxin controls seed dormancy through stimulation of abscisic acid signaling by inducing ARF-mediated ABI3 activation in Arabidopsis. *Proceedings of the National Academy of Sciences* **110**, 15485-15490.
- McCree KJ.** 1981. Photosynthetically active radiation. *Physiological plant ecology I*: Springer, 41-55.
- McElwain JC, Yiotis C, Lawson T.** 2016. Using modern plant trait relationships between observed and theoretical maximum stomatal conductance and vein density to examine patterns of plant macroevolution. *New Phytologist* **209**, 94-103.
- Merilo E, Laanemets K, Hu H, Xue S, Jakobson L, Tulva I, Gonzalez-Guzman M, Rodriguez PL, Schroeder JI, Brosché M.** 2013. PYR/RCAR receptors contribute to ozone-, reduced air humidity-, darkness-, and CO<sub>2</sub>-induced stomatal regulation. *Plant Physiology* **162**, 1652-1668.
- Mishra G, Zhang W, Deng F, Zhao J, Wang X.** 2006. A bifurcating pathway directs abscisic acid effects on stomatal closure and opening in Arabidopsis. *Science* **312**, 264-266.
- Nieves-Cordones M, Caballero F, Martínez V, Rubio F.** 2012. Disruption of the Arabidopsis thaliana inward-rectifier K<sup>+</sup> channel AKT1 improves plant responses to water stress. *Plant and Cell Physiology* **53**, 423-432.
- O’Carrigan A, Hinde E, Lu N, Xu XQ, Duan H, Huang G, Mak M, Bellotti B, Chen ZH.** 2014. Effects of light irradiance on stomatal regulation and growth of tomato. *Environmental and Experimental Botany* **98**, 65-73.
- Pantin F, Renaud J, Barbier F, Vavasseur A, Le Thiec D, Rose C, Barriac T, Casson S, McLachlan DH, Hetherington AM.** 2013. Developmental priming of stomatal sensitivity to abscisic acid by leaf microclimate. *Current Biology* **23**, 1805-1811.
- Pasternak D, Wilson G.** 1973. Illuminance, stomatal opening, and photosynthesis in sorghum and cotton. *Australian Journal of Agricultural Research* **24**, 527-532.
- Pornsiriwong W, Estavillo GM, Chan KX, Tee EE, Ganguly D, Crisp PA, Phua SY, Zhao C, Qiu J, Park J.** 2017. A chloroplast retrograde signal, 3'-phosphoadenosine 5'-phosphate, acts as a secondary messenger in abscisic acid signaling in stomatal closure and germination. *Elife* **6**, e23361.
- Qiu J, Henderson SW, Tester M, Roy SJ, Gilliam M.** 2016. SLAH1, a homologue of the slow type anion channel SLAC1, modulates shoot Cl<sup>-</sup> accumulation and salt tolerance in Arabidopsis thaliana. *Journal of Experimental Botany* **67**, 4495-4505.
- Rabbi B, Chen ZH, Sethuvenkatraman S.** 2019. Protected cropping in warm climates: a review of humidity control and cooling methods. *Energies* **12**, 2737.
- Roelfsema MRG, Hedrich R.** 2005. In the light of stomatal opening: new insights into ‘the Watergate’. *New Phytologist* **167**, 665-691.
- Ronzier E, Corratgé-Faillie C, Sanchez F, Prado K, Brière C, Leonhardt N, Thibaud JB, Xiong TC.** 2014. CPK13, a noncanonical Ca<sup>2+</sup>-dependent protein kinase, specifically inhibits KAT2 and KAT1 shaker K<sup>+</sup> channels and reduces stomatal opening. *Plant Physiology* **166**, 314-326.

- Samaranayake P, Liang W, Chen ZH, Tissue D, Lan YC.** 2020. Sustainable Protected Cropping: A Case Study of Seasonal Impacts on Greenhouse Energy Consumption during Capsicum Production. *Energies* **13**, 4468.
- Savvides A, Fanourakis D, van Ieperen W.** 2012. Co-ordination of hydraulic and stomatal conductances across light qualities in cucumber leaves. *Journal of Experimental Botany* **63**, 1135-1143.
- Schlüter U, Muschak M, Berger D, Altmann T.** 2003. Photosynthetic performance of an Arabidopsis mutant with elevated stomatal density (sdd1-1) under different light regimes. *Journal of Experimental Botany* **54**, 867-874.
- Sethi VP.** 2009. On the selection of shape and orientation of a greenhouse: Thermal modeling and experimental validation. *Solar Energy* **83**, 21-38.
- Shabala S, Shabala L, Bose J, Cuin T, Newman I.** 2013. Ion flux measurements using the MIFE technique. *Plant Mineral Nutrients: Springer*, 171-183.
- Shen YY, Wang XF, Wu FQ, Du SY, Cao Z, Shang Y, Wang XL, Peng CC, Yu XC, Zhu SY.** 2006. The Mg-chelatase H subunit is an abscisic acid receptor. *Nature* **443**, 823-826.
- Sierla M, Waszczak C, Vahisalu T, Kangasjärvi J.** 2016. Reactive oxygen species in the regulation of stomatal movements. *Plant Physiology* **171**, 1569-1580.
- Takahashi Y, Ebisu Y, Kinoshita T, Doi M, Okuma E, Murata Y, Shimazaki KI.** 2013. bHLH transcription factors that facilitate K<sup>+</sup> uptake during stomatal opening are repressed by abscisic acid through phosphorylation. *Sci Signal.* **6**, ra48-ra48.
- Tossi VE, Lamattina L, Jenkins G, Cassia R.** 2014. Ultraviolet-B-induced stomatal closure in Arabidopsis is regulated by the UVR8 photoreceptor in a nitric oxide-dependent mechanism. *Plant Physiology* **164**, 2220-2230
- Vahisalu T, Kollist H, Wang YF, Nishimura N, Chan WY, Valerio G, Lamminmäki A, Brosché M, Moldau H, Desikan R.** 2008. SLAC1 is required for plant guard cell S-type anion channel function in stomatal signalling. *Nature* **452**, 487-491.
- Wan H, Yuan W, Ruan M, Ye Q, Wang R, Li Z, Zhou G, Yao Z, Zhao J, Liu S.** 2011. Identification of reference genes for reverse transcription quantitative real-time PCR normalization in pepper (*Capsicum annuum L.*). *Biochemical and Biophysical Research Communications* **416**, 24-30.
- Wang FF, Lian HL, Kang CY, Yang HQ.** 2010. Phytochrome B is involved in mediating red light-induced stomatal opening in Arabidopsis thaliana. *Molecular Plant* **3**, 246-259.
- Wang Y, Chen ZH.** 2020. Does Molecular and Structural Evolution Shape the Speedy Grass Stomata? *Frontiers in Plant Science* **11**, 333.
- Weatherley P.** 1950. Studies in the water relations of the cotton plant: I. The field measurement of water deficits in leaves. *New Phytologist* **49**, 81-97.
- White RJ.** 2014. Vent, fog and fan, a cooling system for large greenhouses in hot weather with low humidity. XXIX International Horticultural Congress on Horticulture: Sustaining Lives, Livelihoods and Landscapes (IHC2014): **1107**, 61-66.
- Xu J, Li Y, Wang R, Liu W, Zhou P.** 2015. Experimental performance of evaporative cooling pad systems in greenhouses in humid subtropical climates. *Applied Energy* **138**, 291-301.

**Xu YH, Liu R, Yan L, Liu ZQ, Jiang SC, Shen YY, Wang XF, Zhang DP.** 2012. Light-harvesting chlorophyll a/b-binding proteins are required for stomatal response to abscisic acid in *Arabidopsis*. *Journal of Experimental Botany* **63**, 1095-1106.

**Zhao C, Haigh AM, Holford P, Chen ZH.** 2018. Roles of chloroplast retrograde signals and ion transport in plant drought tolerance. *International Journal of Molecular Sciences* **19**, 963.

**Zhao C, Wang Y, Chan KX, Marchant DB, Franks PJ, Randall D, Tee EE, Chen G, Ramesh S, Phua SY.** 2019. Evolution of chloroplast retrograde signaling facilitates green plant adaptation to land. *Proceedings of the National Academy of Sciences* **116**, 5015-5020.



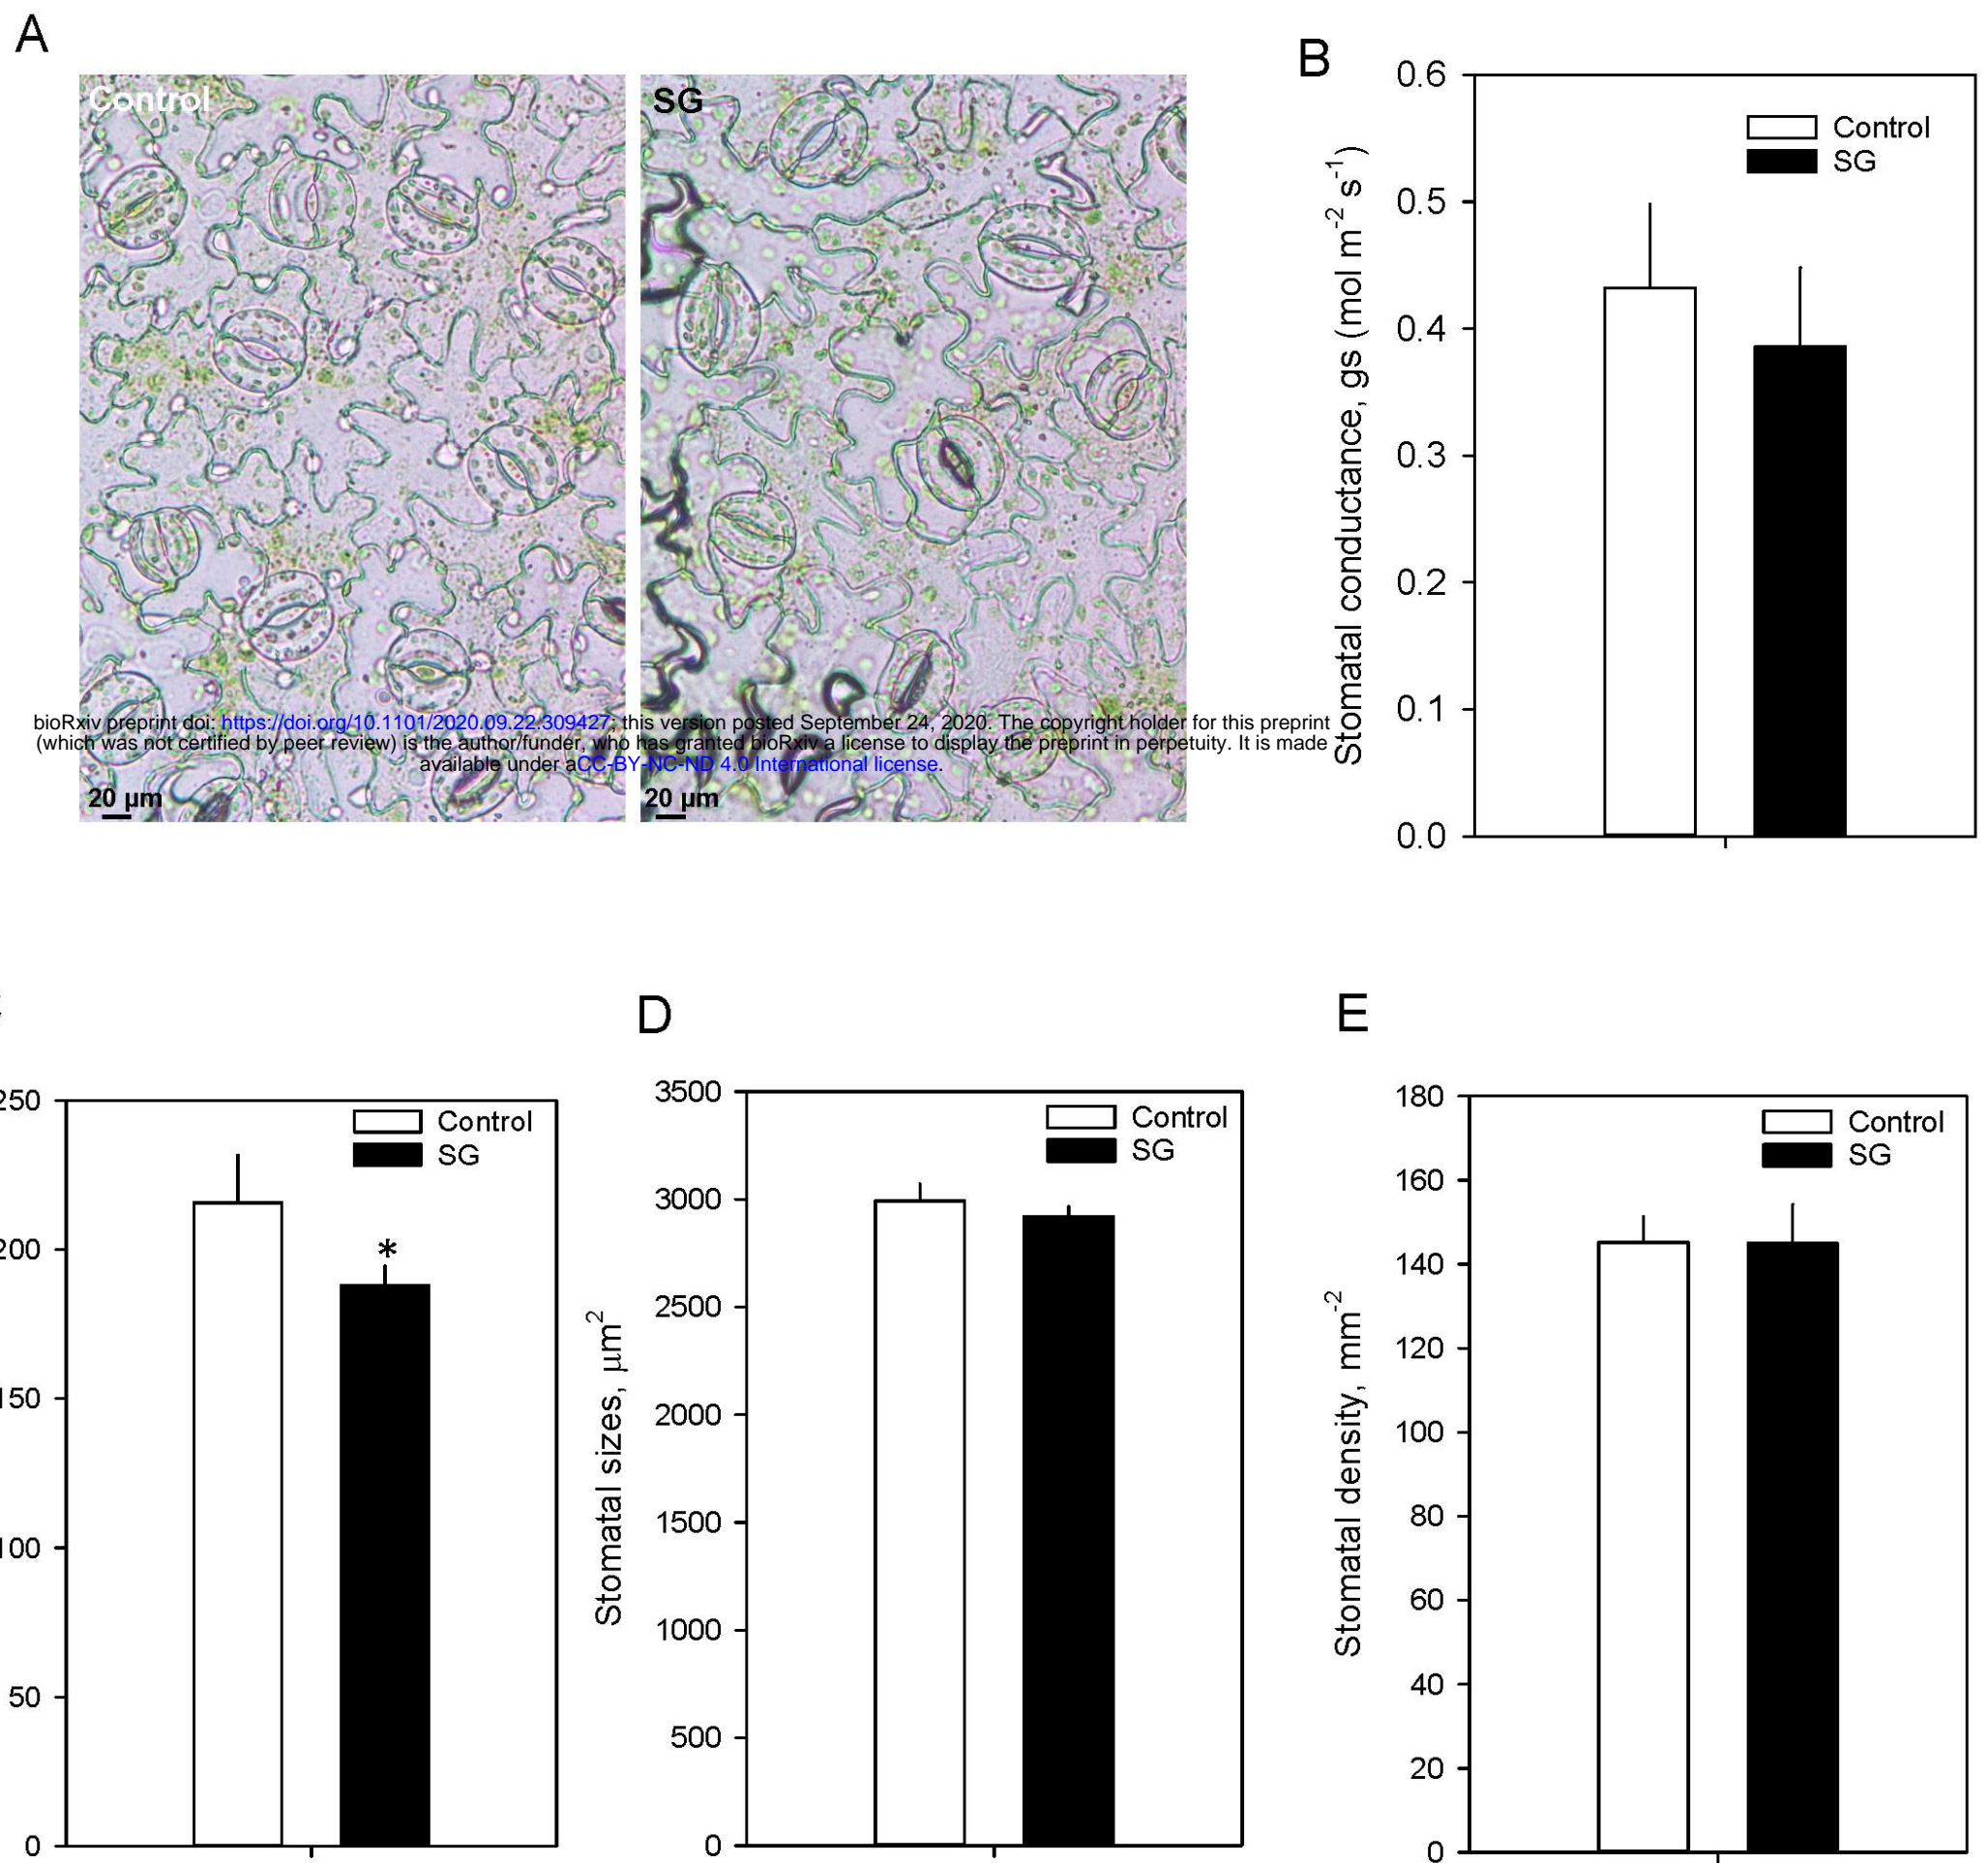

**Fig 1. Effect of smart glass (SG) on stomatal traits of capsicum.** (A) representative stomatal photos collected from epidermal peels of both control and SG. Scale bar = 20  $\mu\text{m}$  (B) stomatal conductance in the control and SG under control conditions (1500 PAR at initial stable stage). (C-E) stomatal pore size, stomatal size and stomatal density in the control and SG (n=5 biological replicate with 50-80 stomata). Values are means  $\pm$  SE. \*P<0.05.

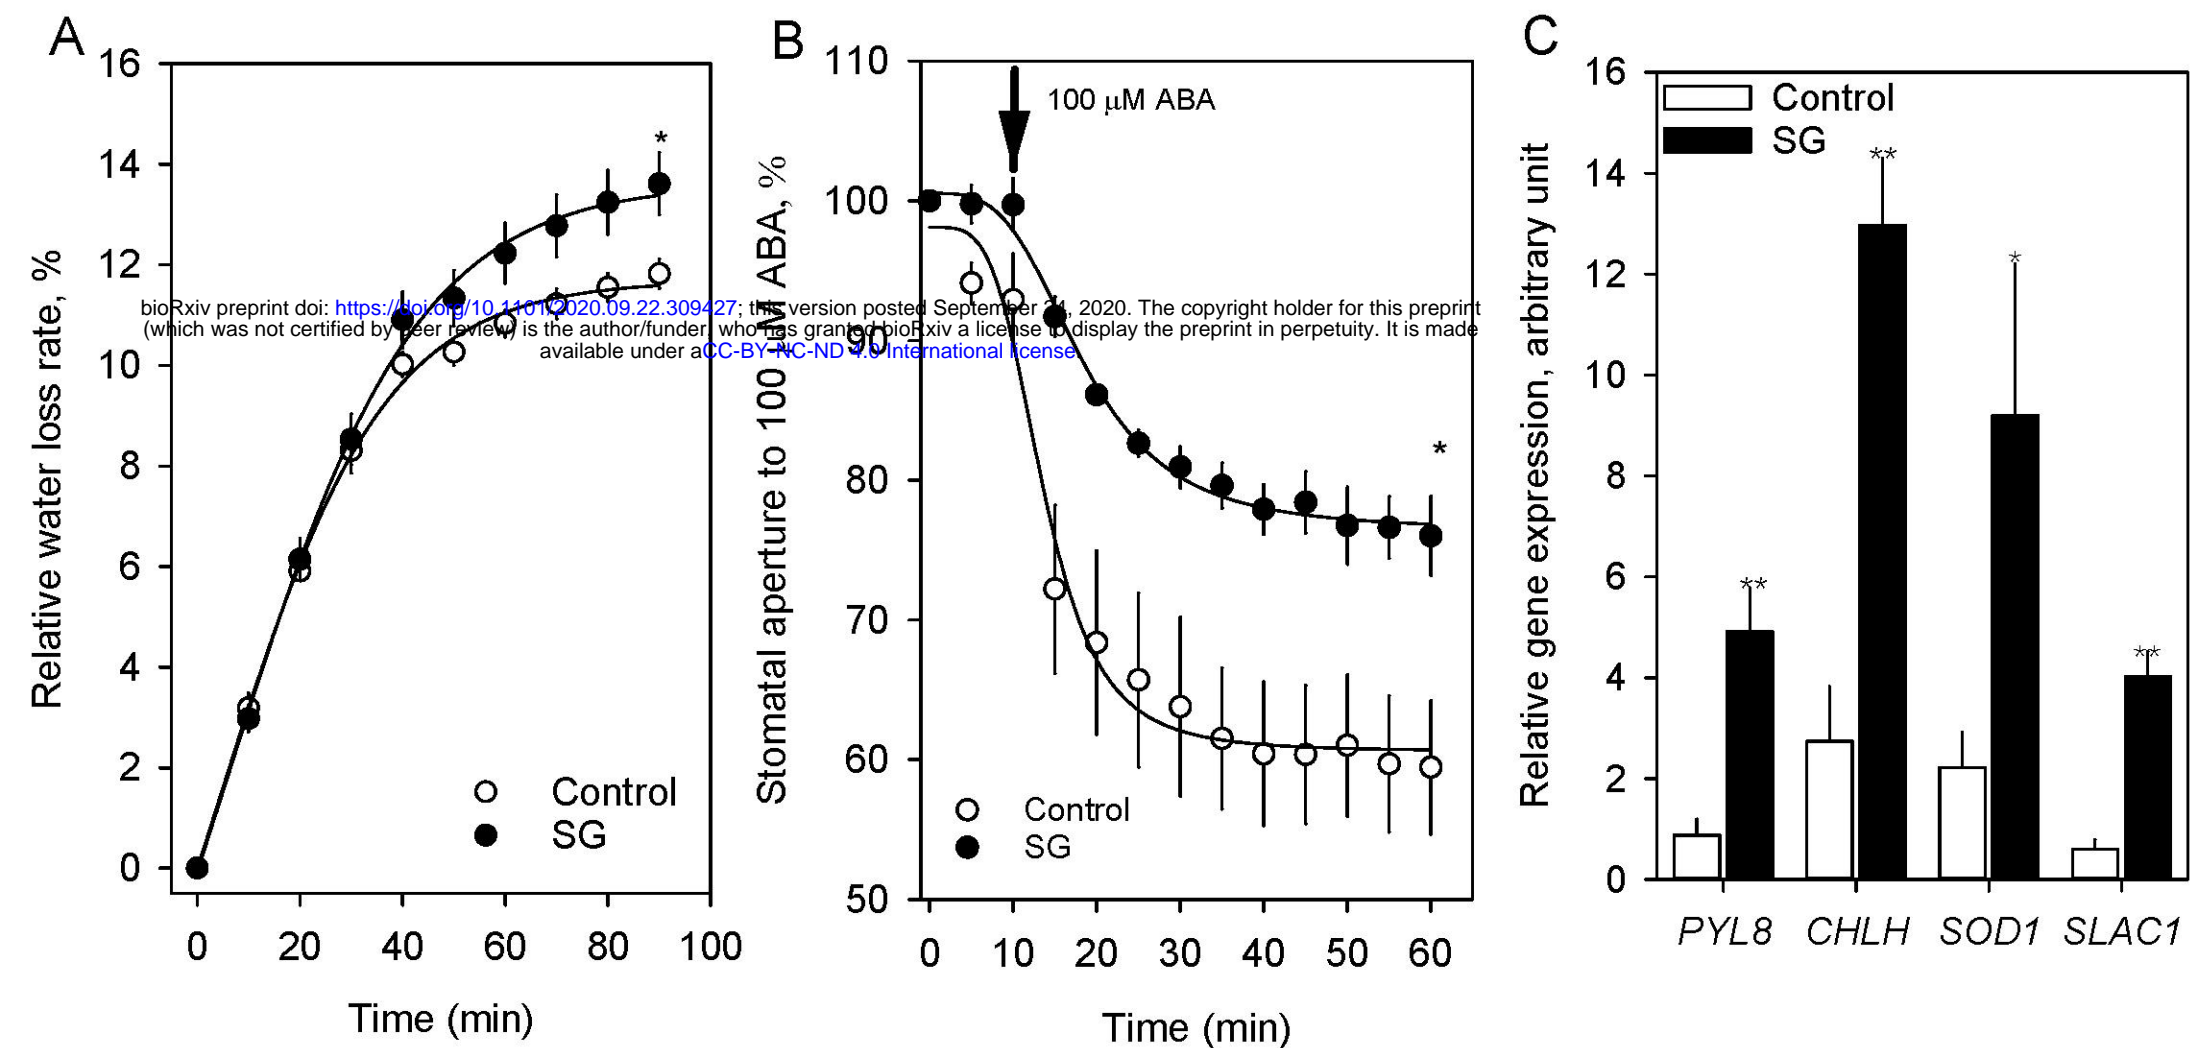

**Fig 2. Smart glass (SG) alters relative water loss, ABA-induced stomatal closure, and expression of genes of ABA signalling in capsicum.** (A) relative water loss was calculated based on the mass loss every ten min. Values are means  $\pm$  SE (n=5). (B) stomatal response to exogenous 100  $\mu$ M ABA. Data are mean  $\pm$  SE (n=4 biological replicates from 30 to 80 stomata). (C) relative expression of genes of ABA signalling from epidermis. *Pyrabactin resistance8* (PYL8), *Mg-chelatase H subunit* (CHLH); *superoxide dismutase* (SOD) and *slow anion channel-associated 1* (SLAC1). Data are means  $\pm$  SD (n=4 biological replicates with 2 technical replicates). \*P<0.05; \*\*P<0.01.



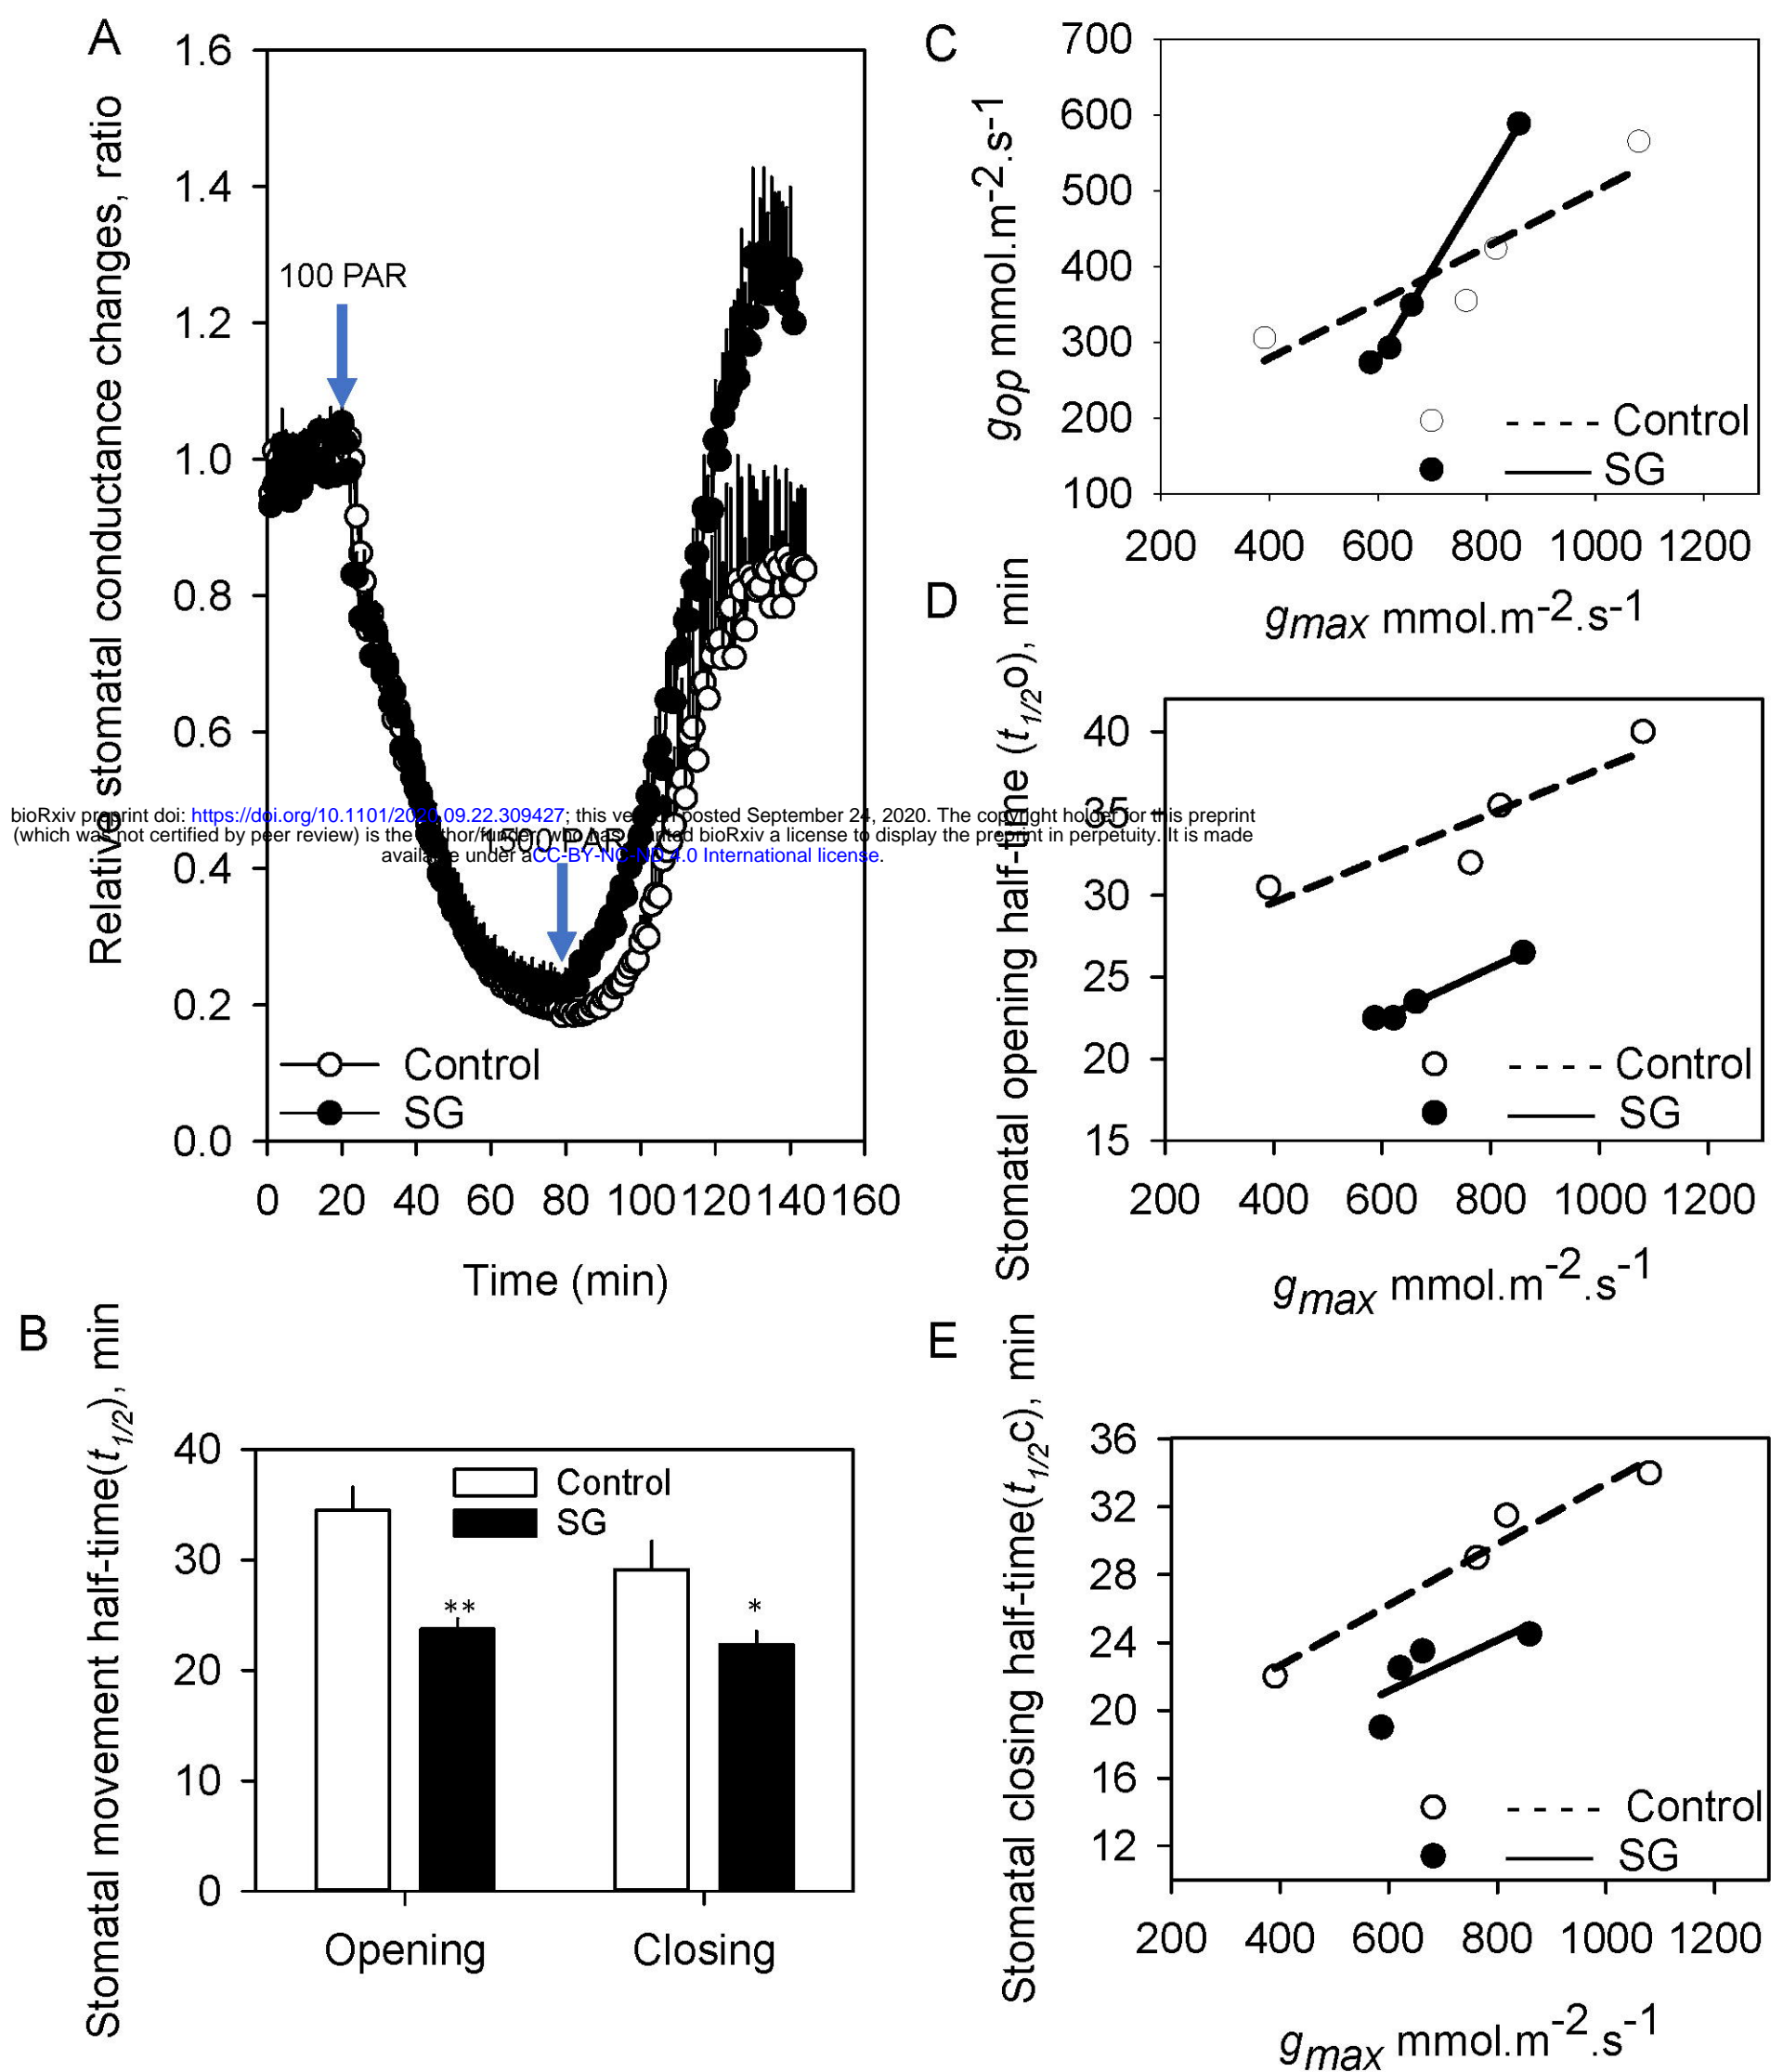

**Fig 3. Effect of smart glass (SG) on stomatal sensitivity to light transitions in capsicum.** (A) Stomatal conductance was initially stabilized and recorded under 1500 PAR then reduced to 100 PAR for 1 hour and followed by 1500 PAR for another 1 h. The averaged stomatal conductance value from the initial 20 min was used for normalizing stomatal conductance ratios to the initial control stage. (B) half stomatal opening time ( $t_{1/2o}$ ) and half stomatal closure time ( $t_{1/2c}$ ) in response to light transitions. (C-E) correlation analysis between maximum theoretical stomatal conductance ( $g_{max}$ ) and operational stomatal conductance ( $g_{op}$ ) and stomatal opening and closing half-times ( $t_{1/2}$ ). Data are means  $\pm$  SE (n=4). \*P<0.05; \*\*P<0.01.



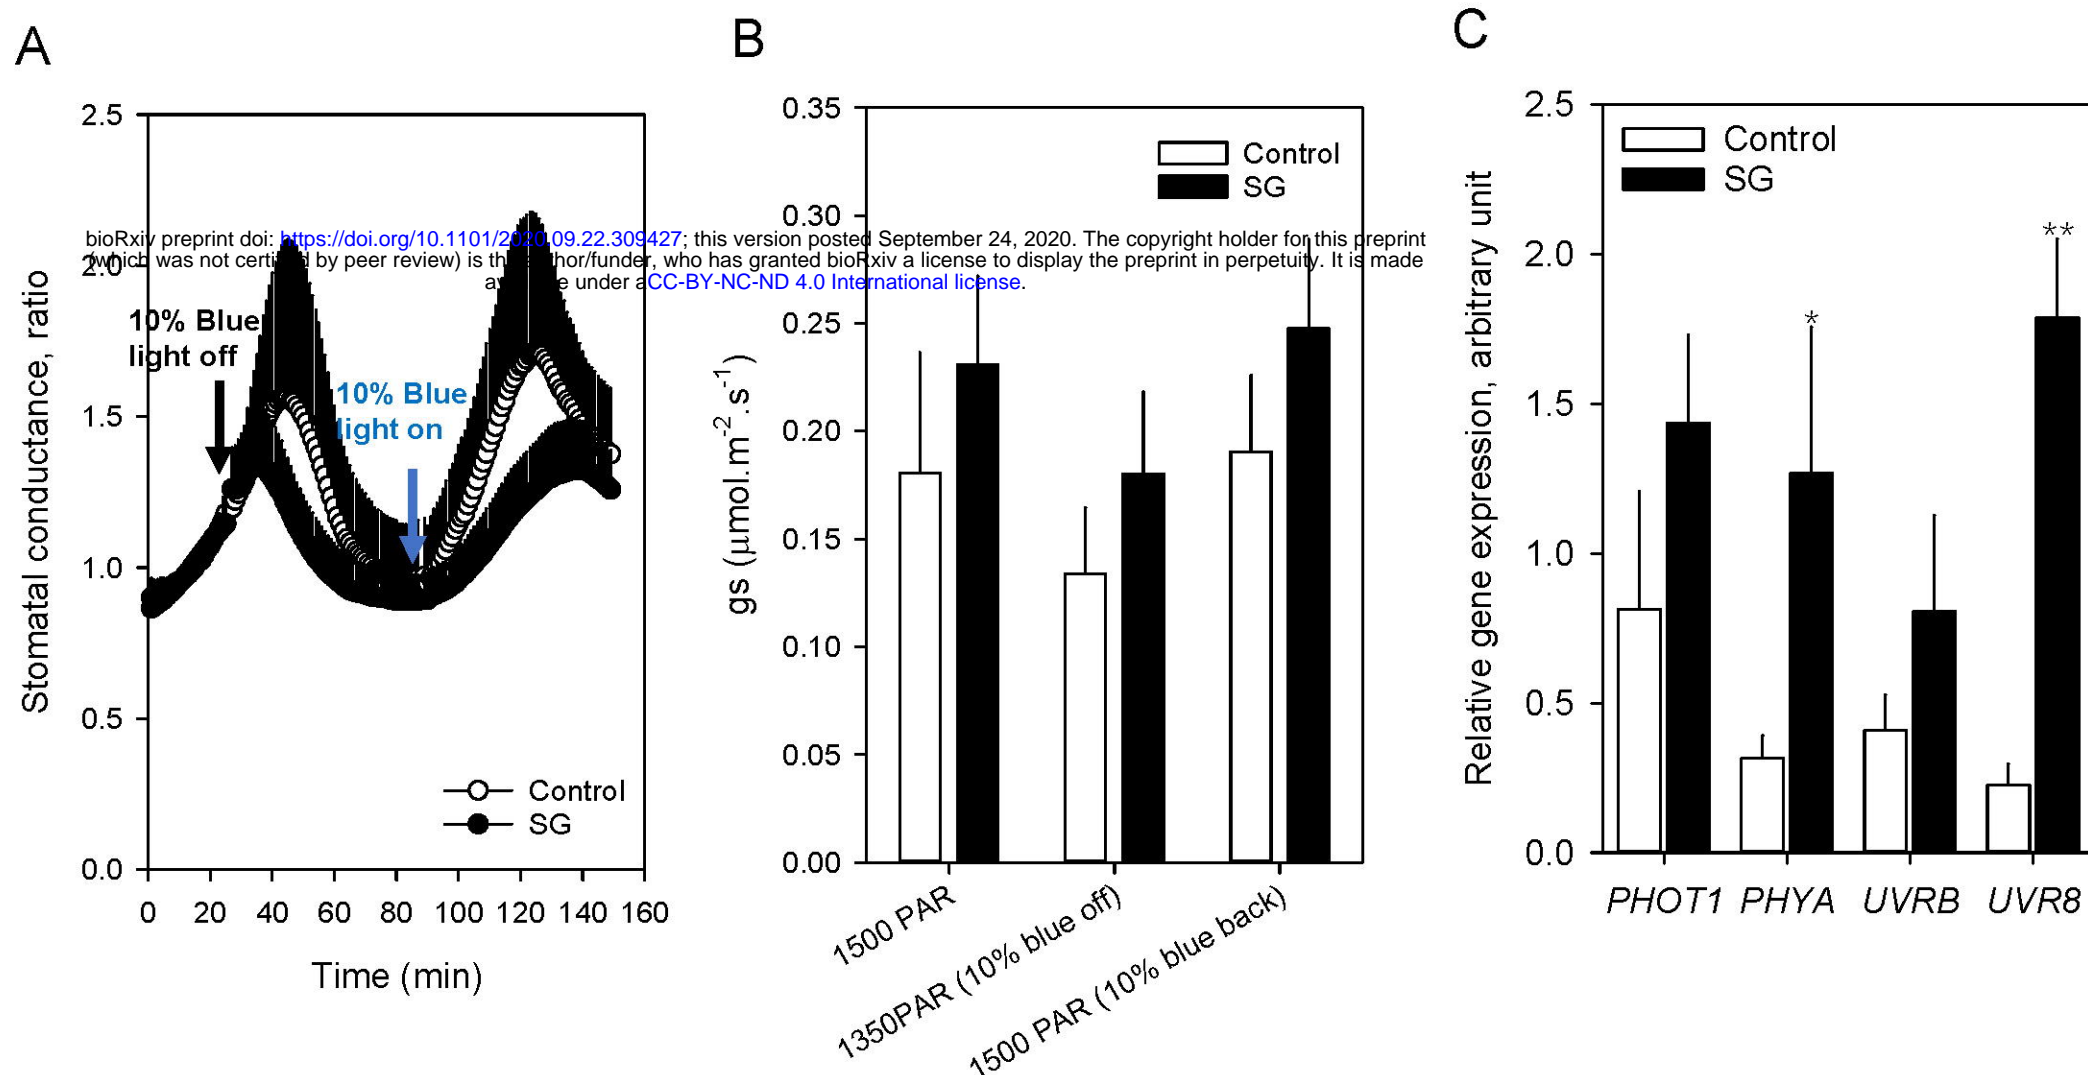

**Fig 4. Smart glass (SG) induces different stomatal responses to blue light and gene expression in capsicum.** (A) stomatal conductance was monitored in three light conditions: normal light (1500 PAR: 1350 Red + 150 Blue) for 20 min, 1350 Red PAR for 1 hour, and normal light for another 1 h. The averaged stomatal conductance value from the initial 20 min measurement was used for normalizing stomatal conductance ratios. (B), bar graphs are three points of the end of each light condition. Data are means  $\pm$  SE (n=4) (C) gene expression of *Phototropin 1 (PHOT1)*, *Phytochrome A (PHYA)*, *UV response elements (UVRB)* and *UV-B Receptor 8 (UVR8)*. Data are means  $\pm$  SE (n=4 biological replicates with 2 technical replicates). \*P<0.05; \*\*P<0.01.

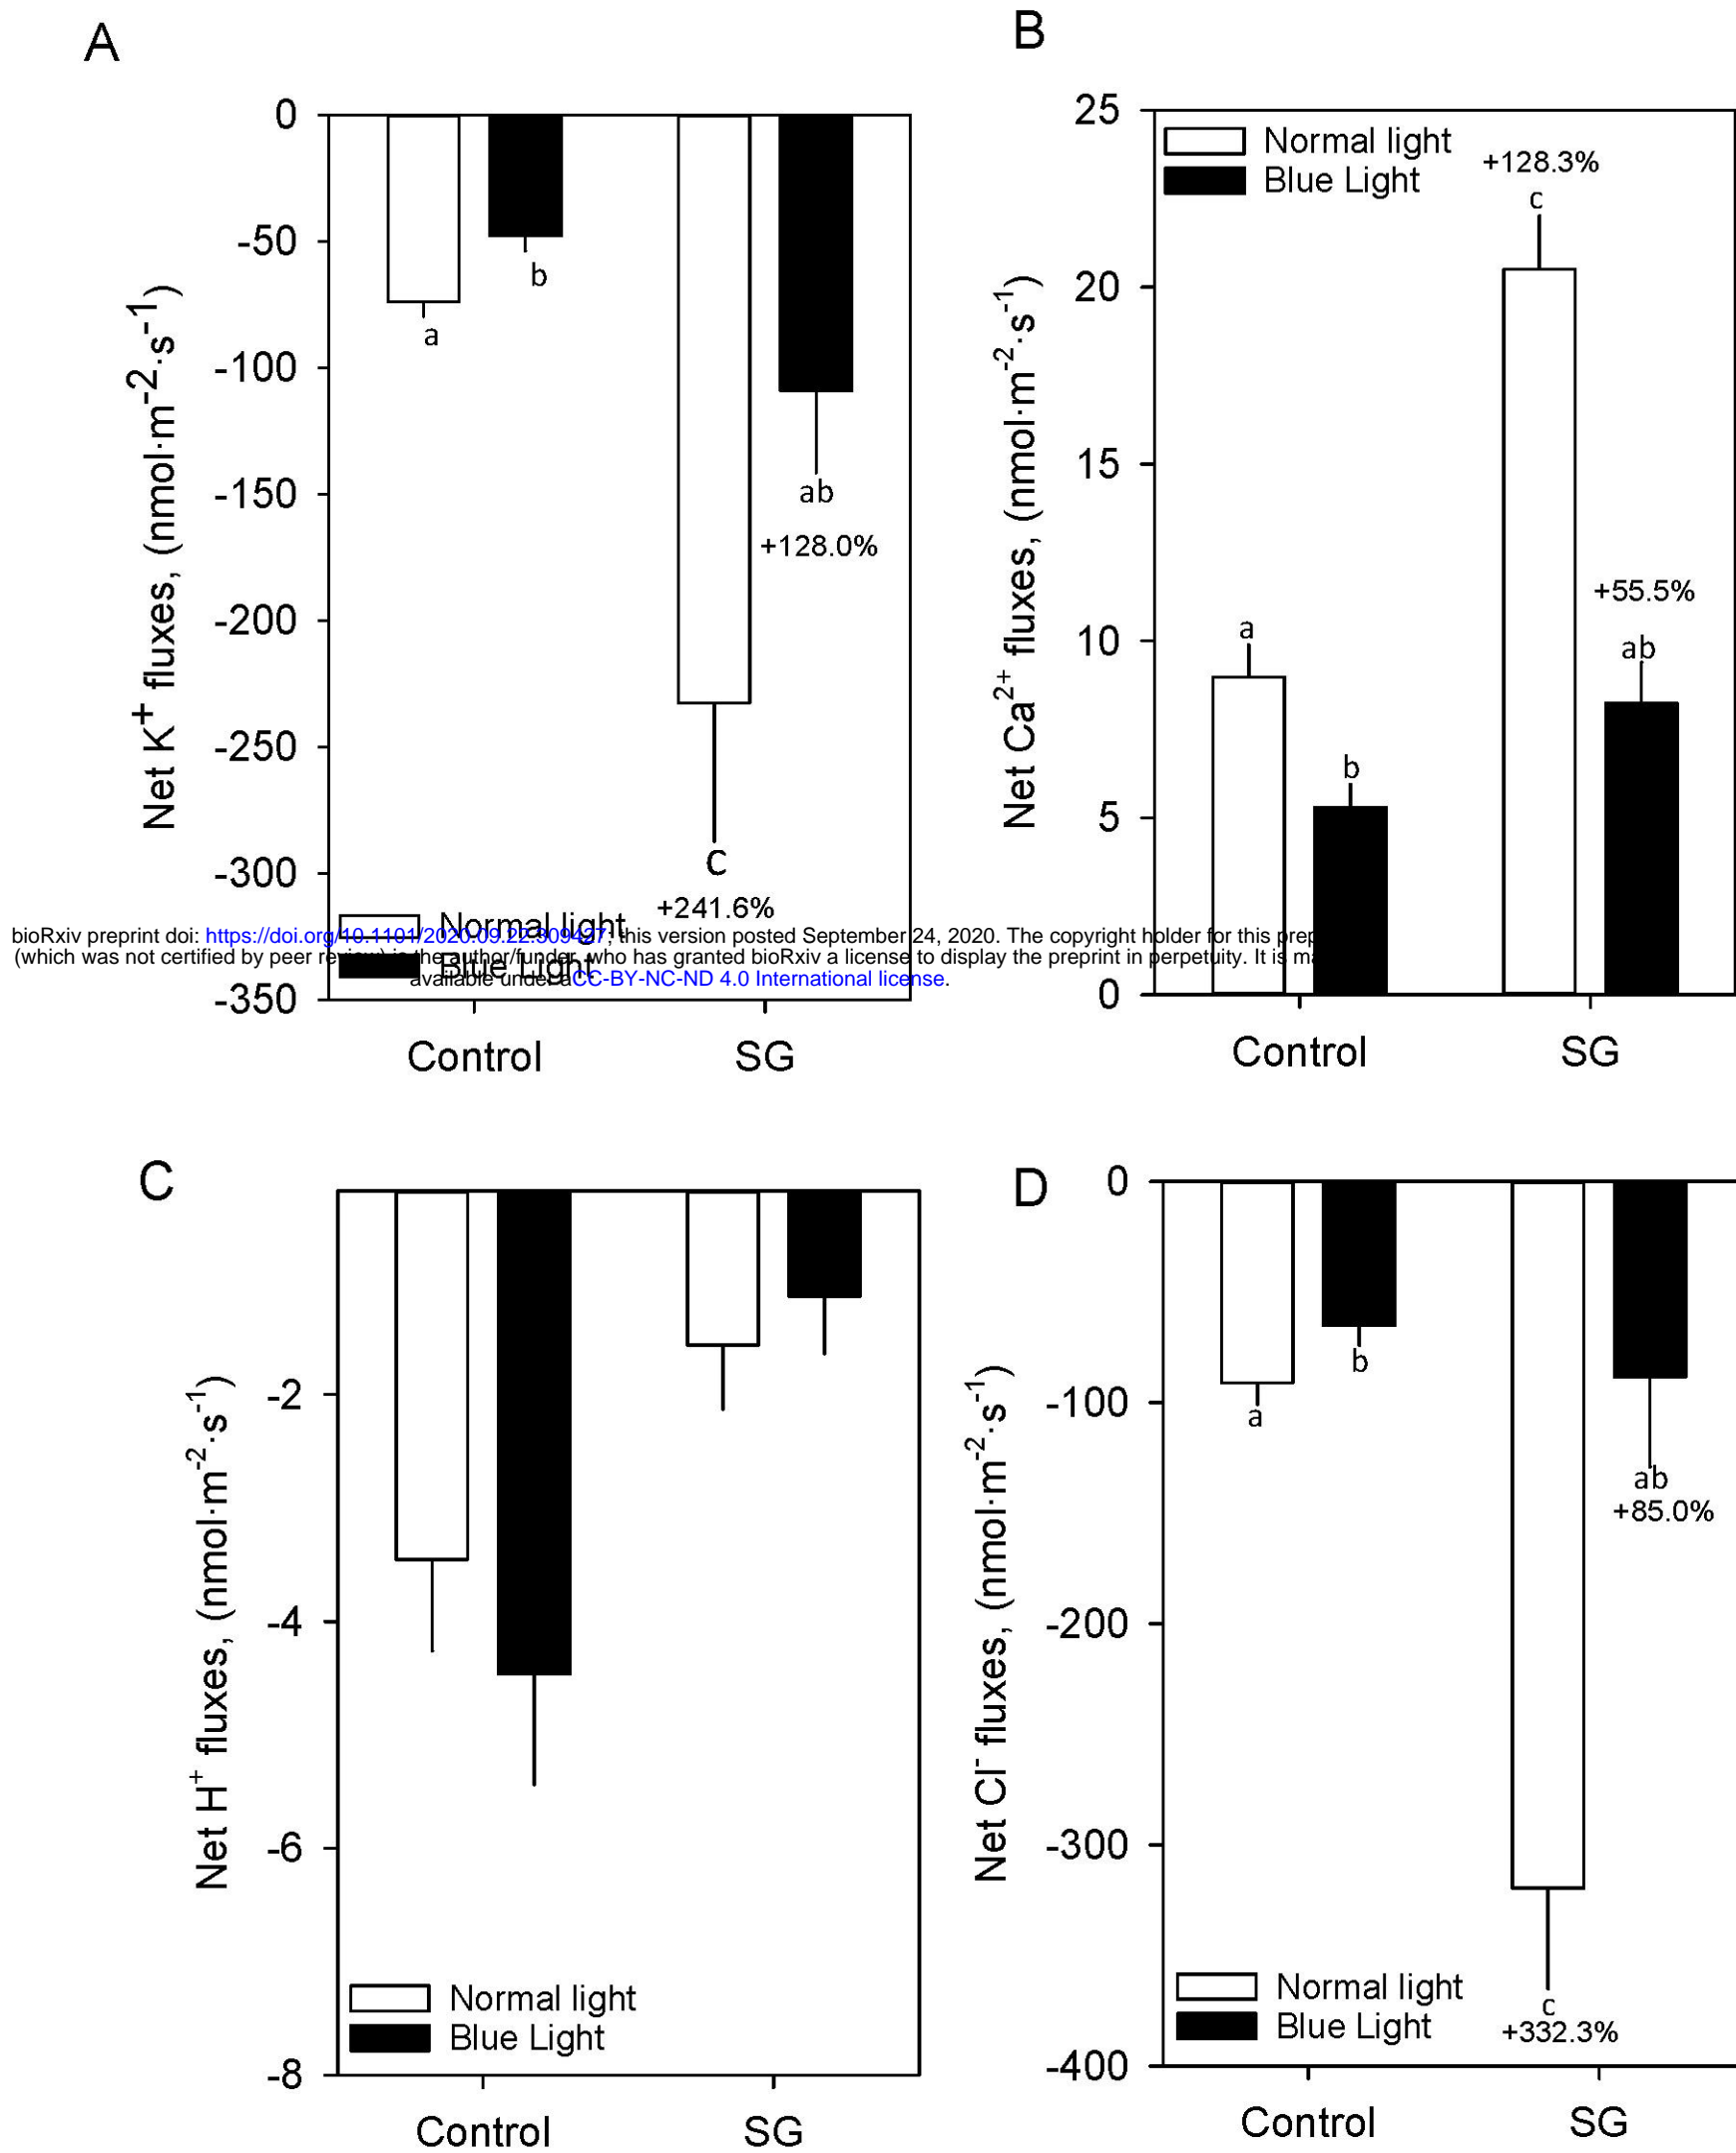

**Fig 5 Smart glass (SG) affects ion fluxes and their regulation by blue light in guard cell of capsicum.** Net fluxes of K<sup>+</sup> (A), Ca<sup>2+</sup> (B), H<sup>+</sup> (C) and Cl<sup>-</sup> (D) were recorded from guard cells in leaf epidermal peels. Data are means ± SE (n=5 to 7 plants). Different lowercase letters represent the statistical difference.

Prolonged low light condition

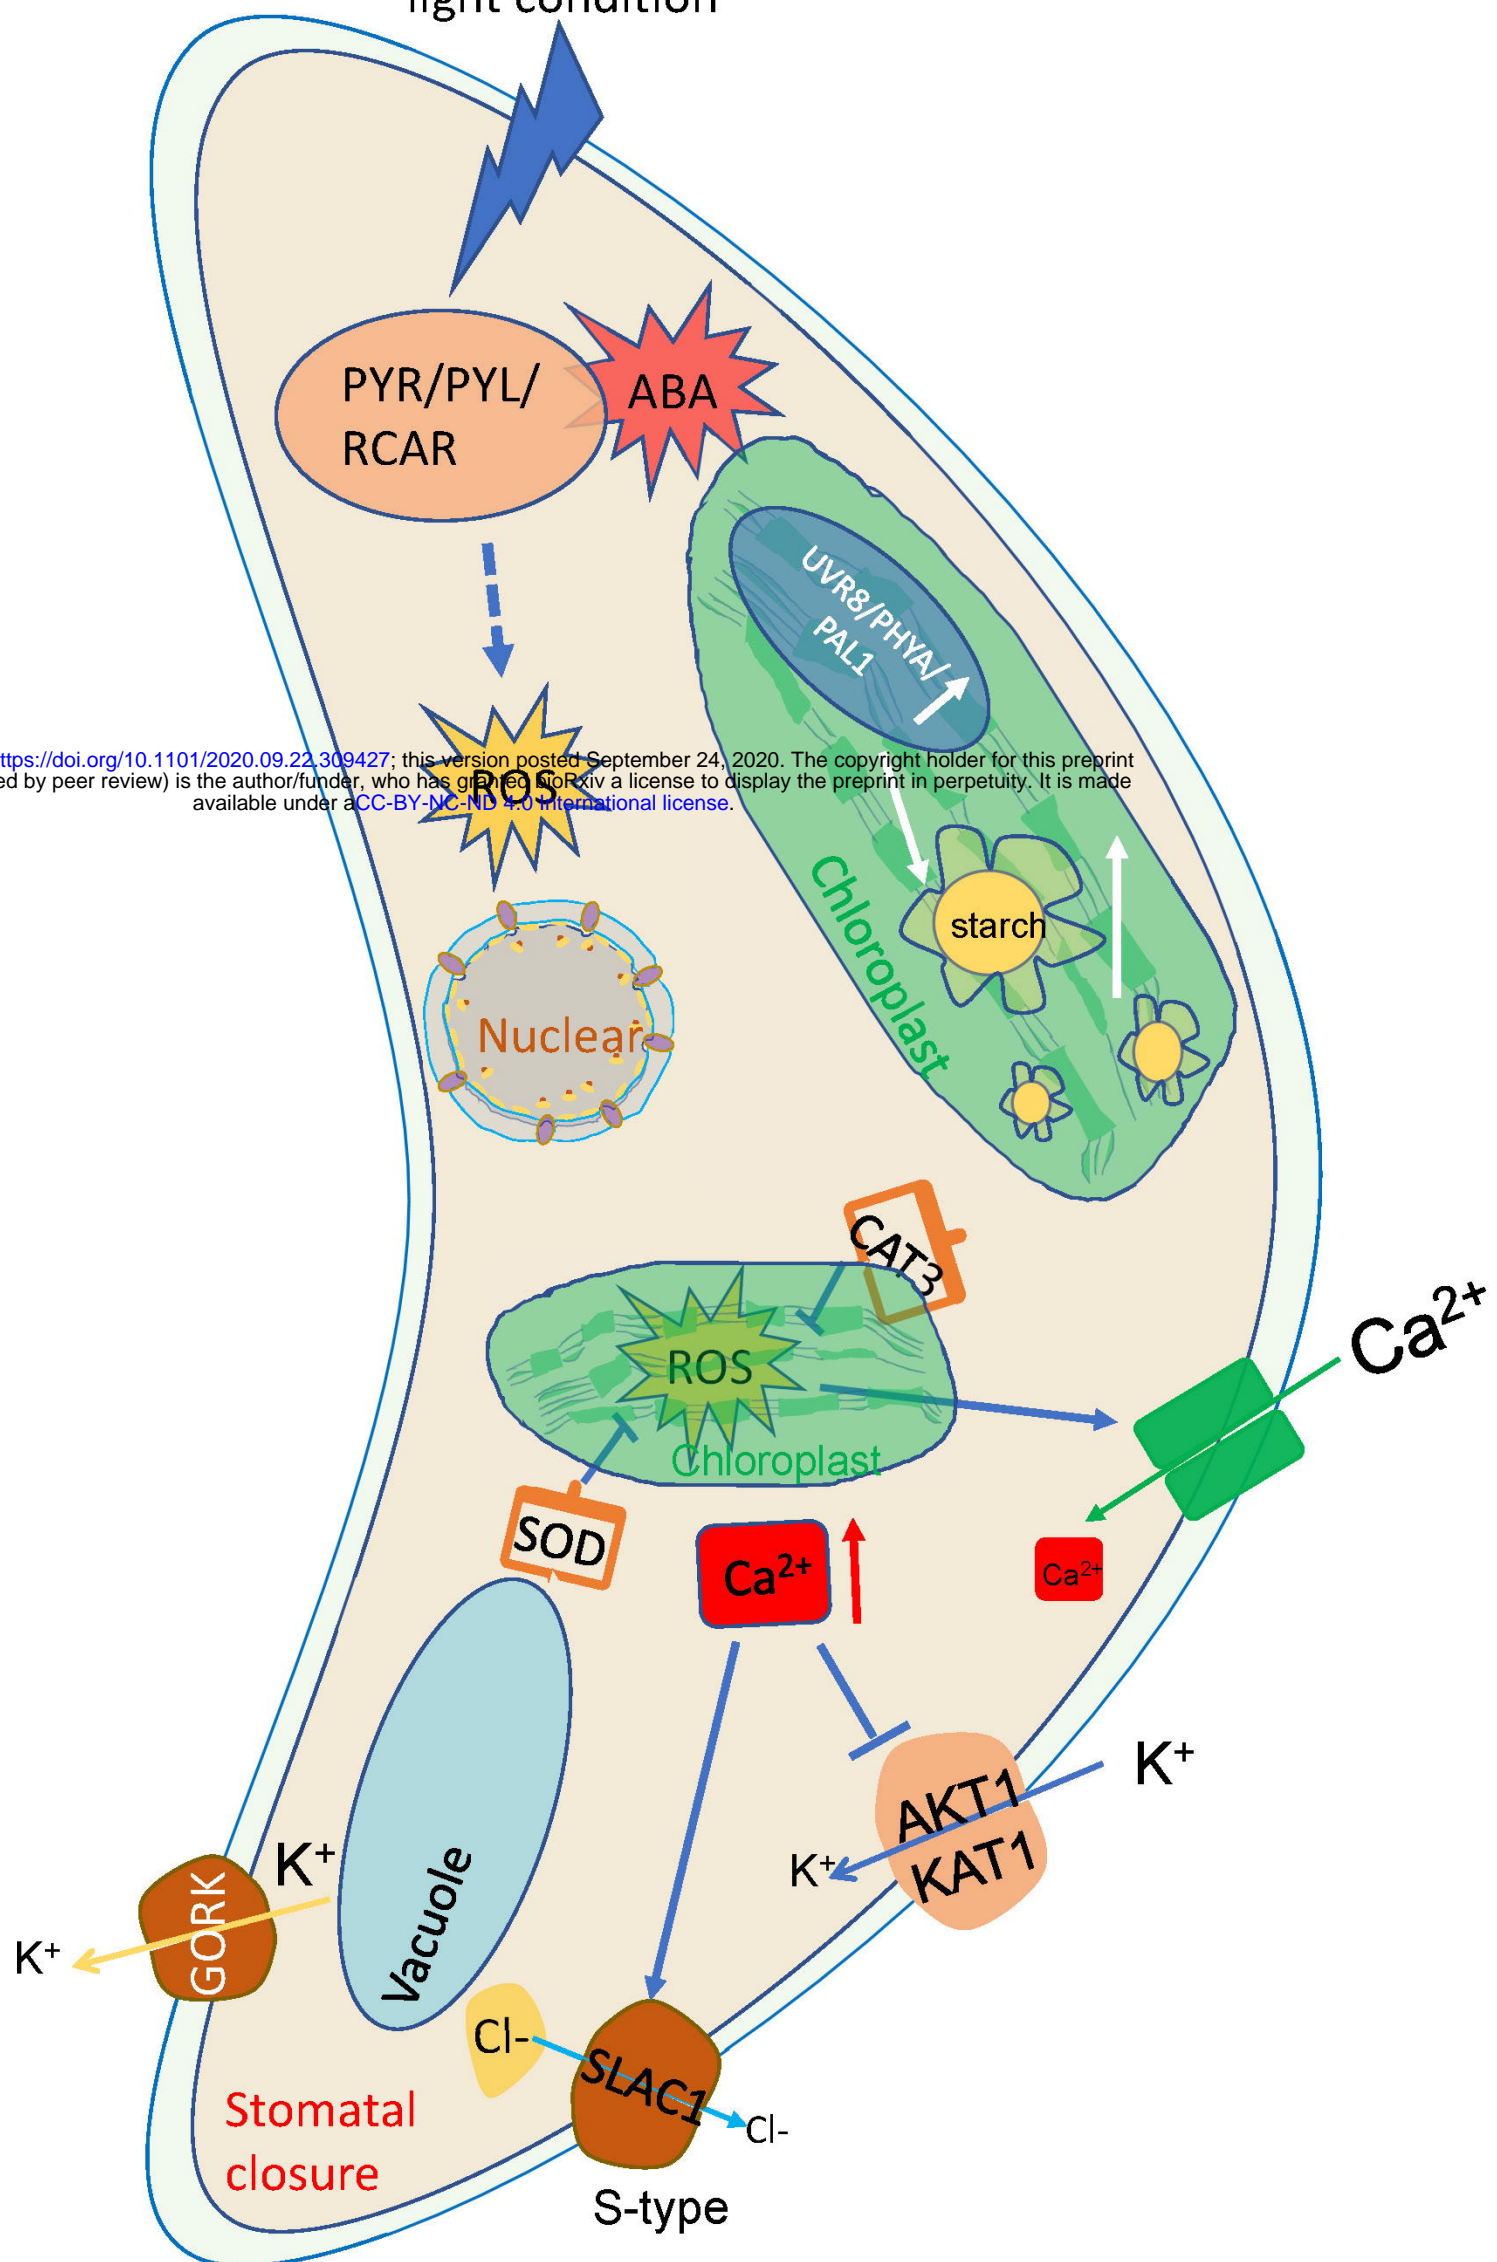

bioRxiv preprint doi: <https://doi.org/10.1101/2020.09.22.309427>; this version posted September 24, 2020. The copyright holder for this preprint (which was not certified by peer review) is the author/funder, who has granted bioRxiv a license to display the preprint in perpetuity. It is made available under aCC-BY-NC-ND 4.0 International license.

**Fig 6 Schematic summary of smart glass (SG)-induced low light condition on guard cell signalling network in capsicum.** Under prolonged low light conditions, ABA reception was highly upregulated, leading to the ROS accumulation in guard cells. ROS activated  $\text{Ca}^{2+}$  influx and thus induced cytosolic  $\text{Ca}^{2+}$  accumulation in guard cells. Accumulated ROS and  $\text{Ca}^{2+}$  suppressed  $\text{K}^{+}$  inward channels AKT1/KAT1 and activated slow anion channels SLAC1 (Brandt *et al.*, 2012) and  $\text{K}^{+}$  outward channel GORK. Besides, photosynthesis related genes also play roles in inducing stomatal closure by accumulating starch in guard cells.
